# Supplementary material for: Temperature and insulin signaling regulate body size in Hydra by the Wnt and TGF-beta pathways
Source: PubMed Central journal article supplement (PMC6646324; doi:10.1038/s41467-019-11136-6), 2019-07-22

**Supplementary Data 1. Normalized read counts of the transcriptome analysis revealed many potential transcripts affecting size.**

The different conditions (temperature shift, INSR-HP, and FoxO-HP) affect various genes which have the potential to alter body size or are associated with developmental pathways or environmental signal reception. The plots are sorted in alphabetical order for gene names and include the differentials from Table 1 and those described in the main text. Note that several isoforms which were grouped in the KEGG analysis are plotted separately. n=5 libraries, \*:p ≤0.05, \*\*:p ≤ 0.01, \*\*\*:p ≤ 0.001 (Wald-test + FDR-correction).

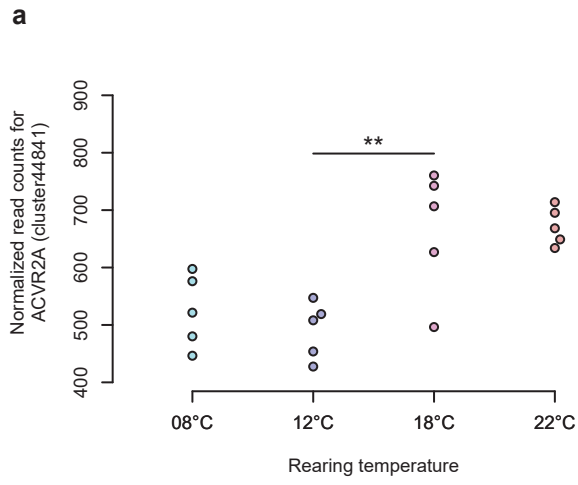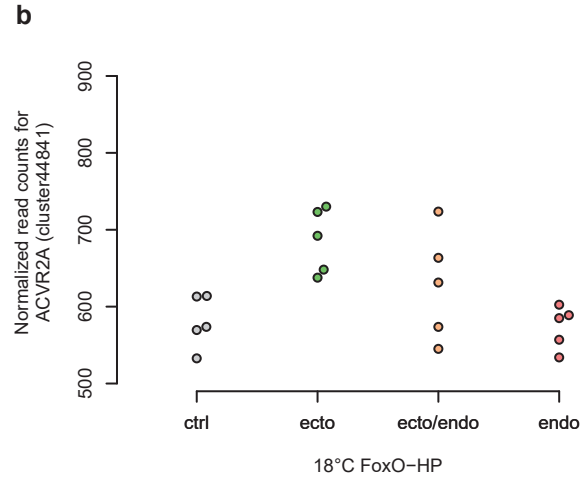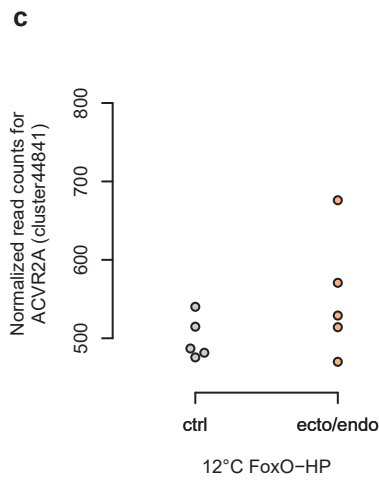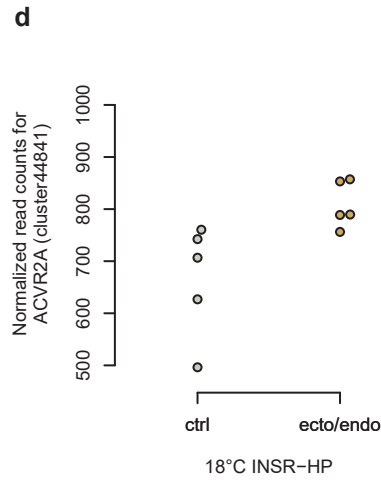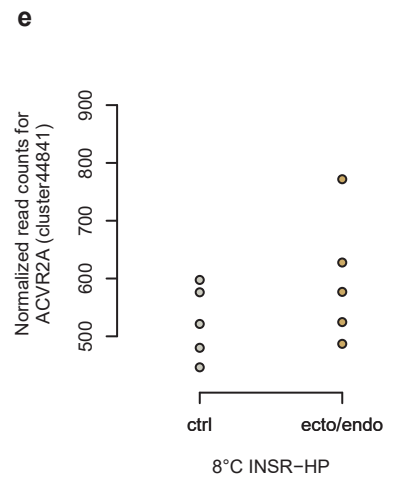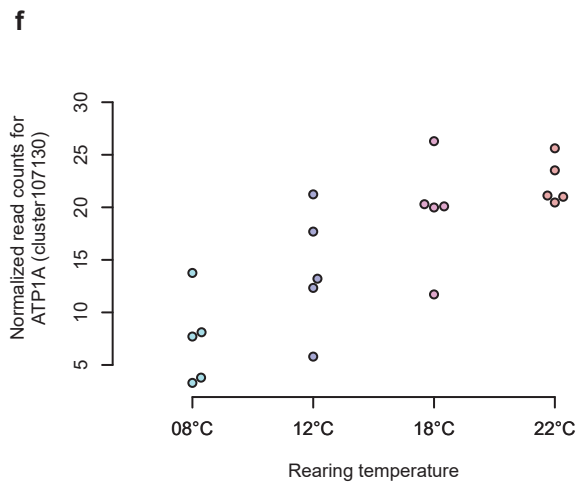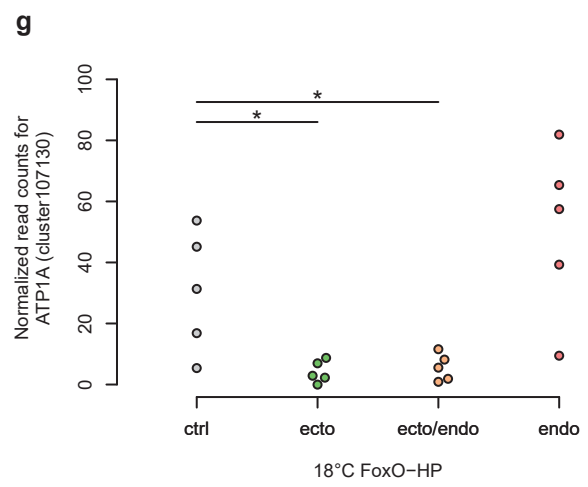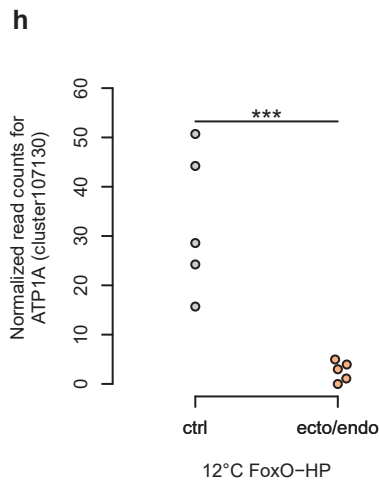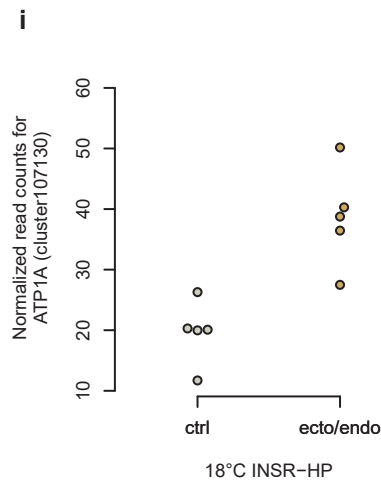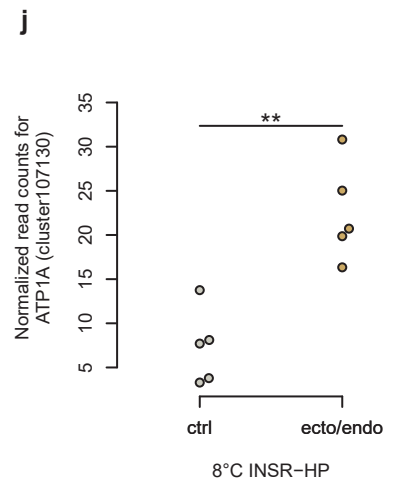



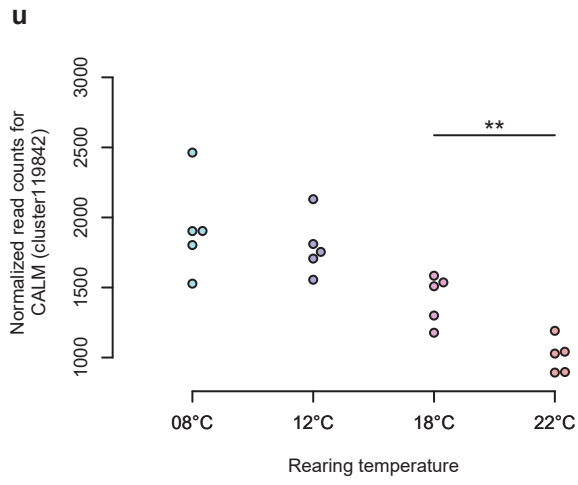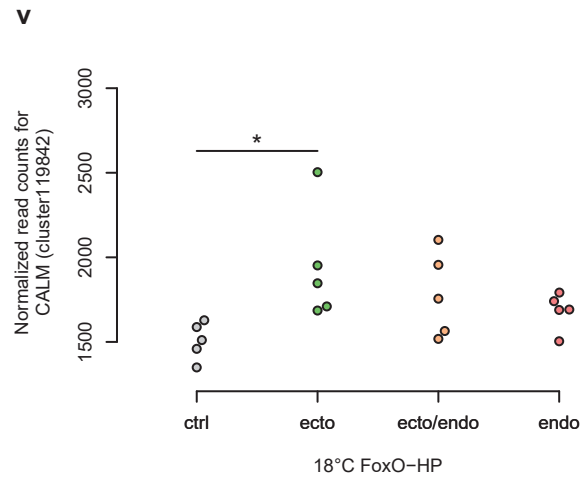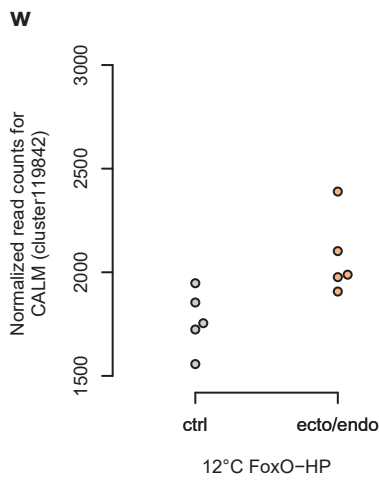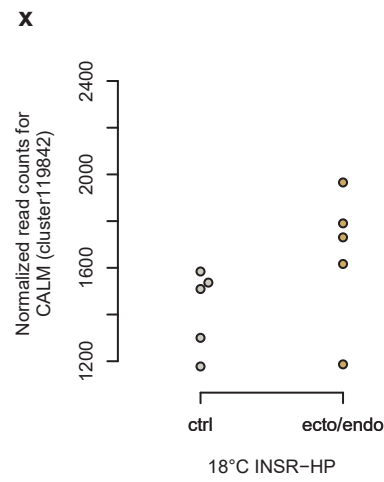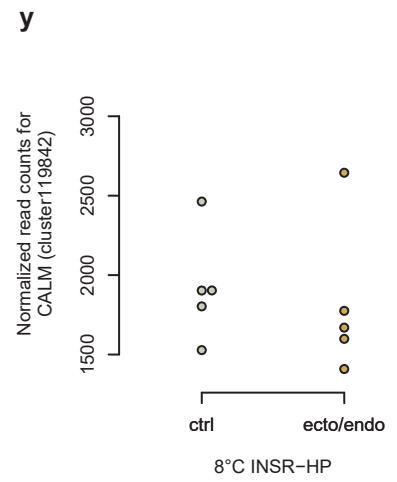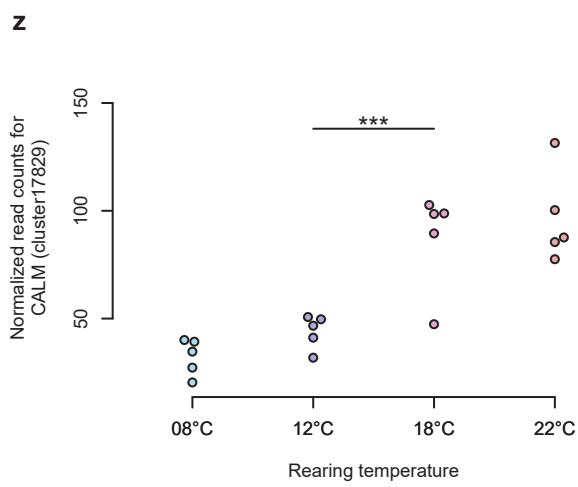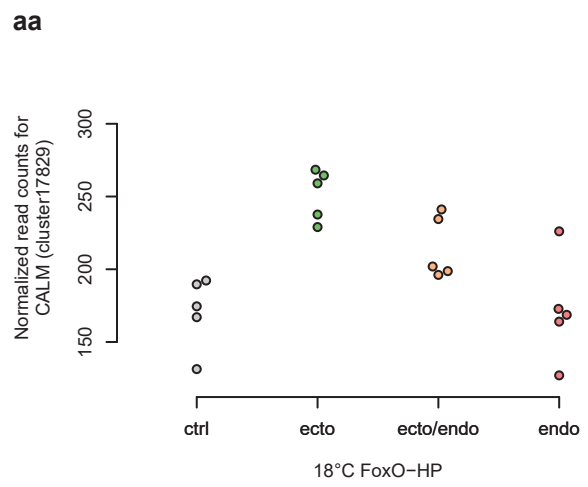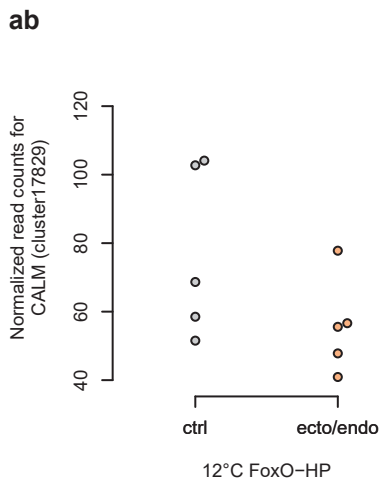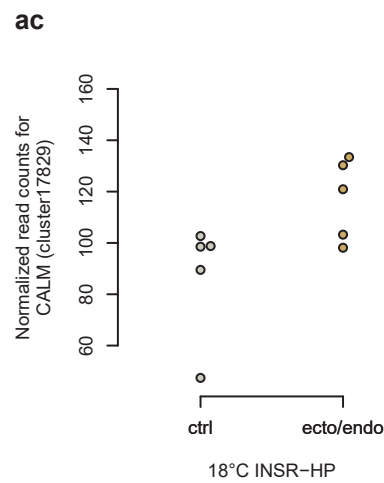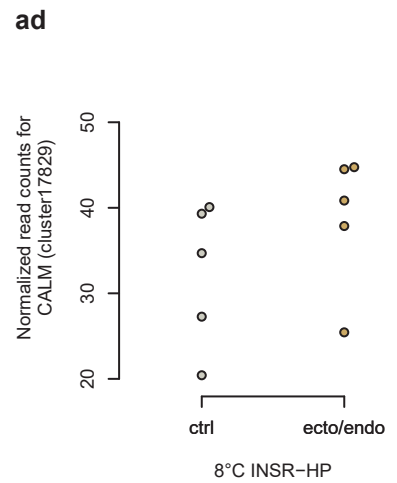



**ao**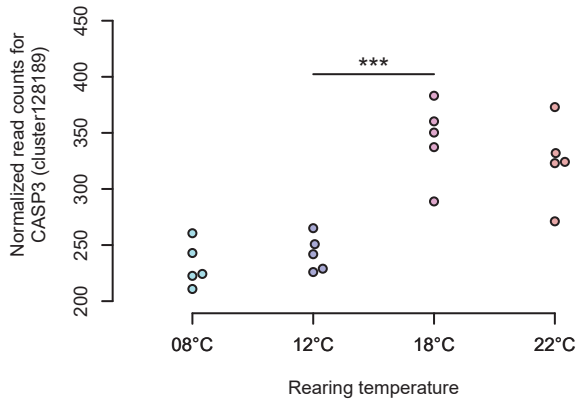**ap**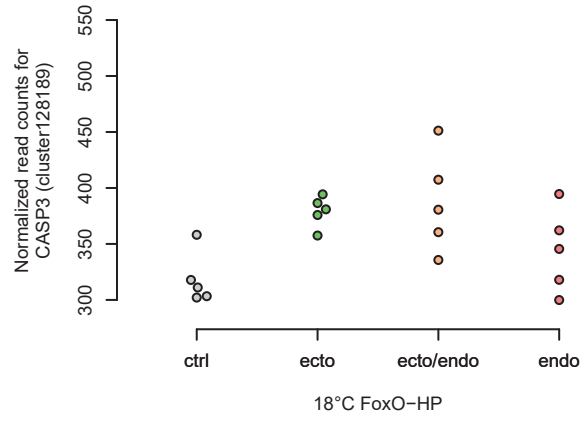**aq**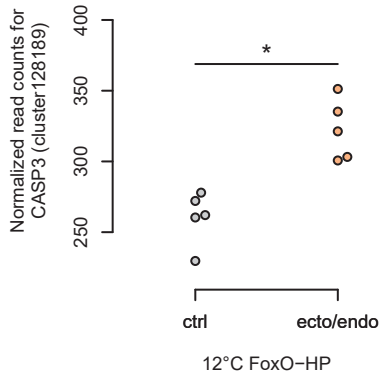**ar**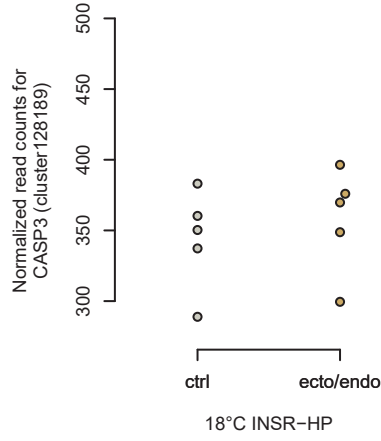**as**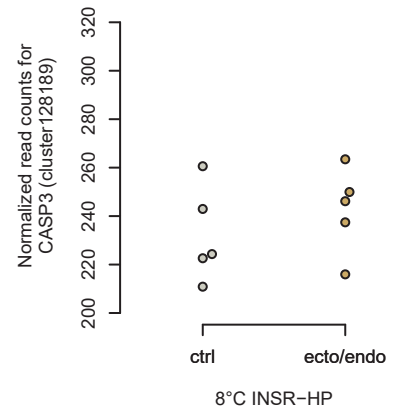**at**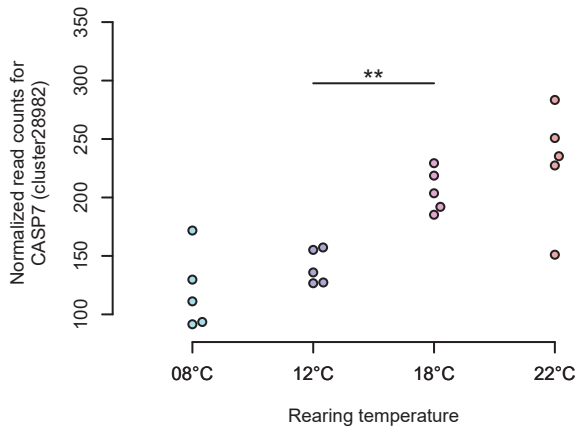**au**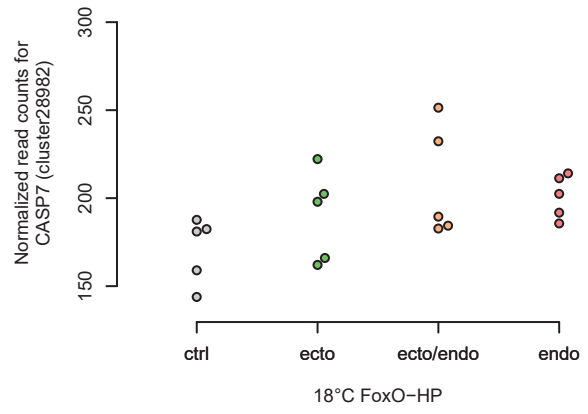**av**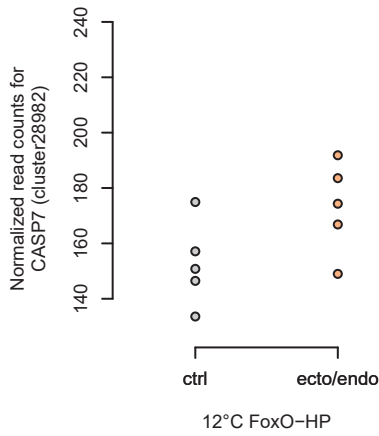**aw**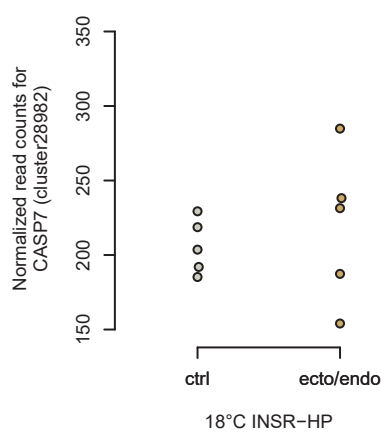**ax**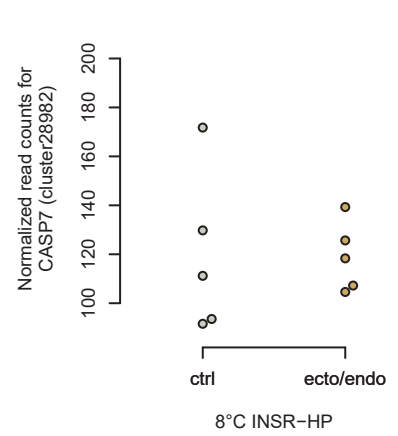

**ay**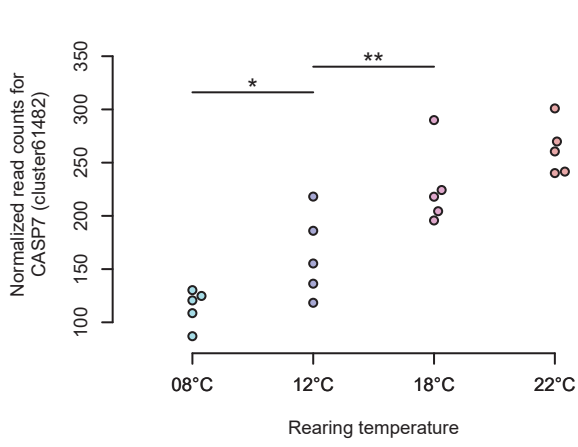**az**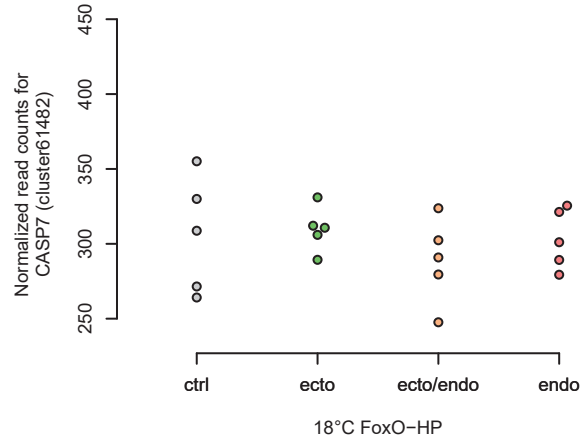**ba**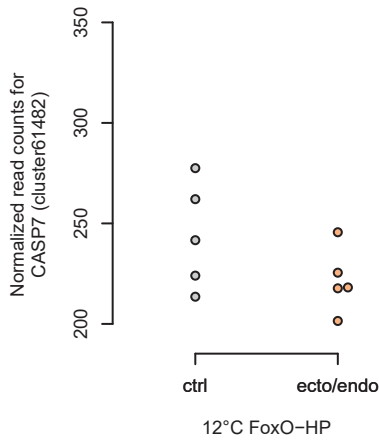**bb**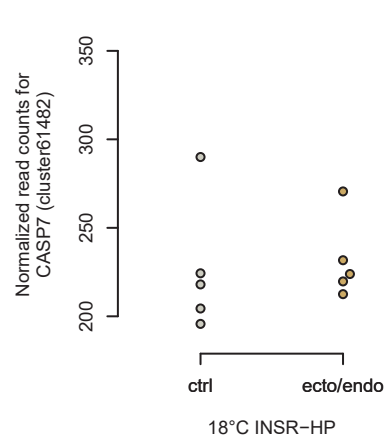**bc**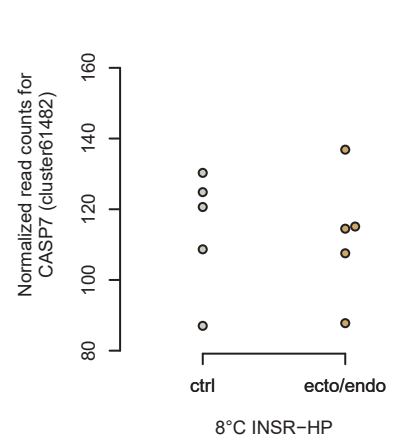**bd**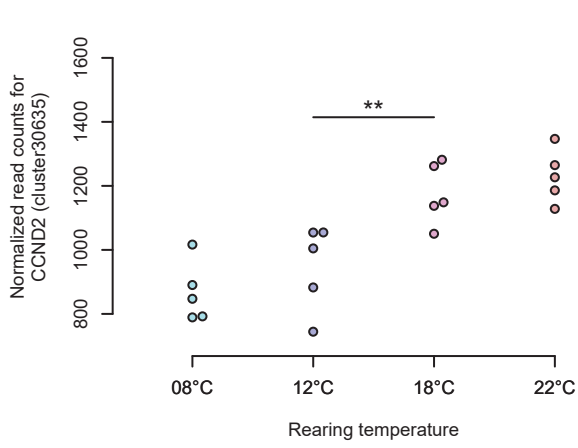**be**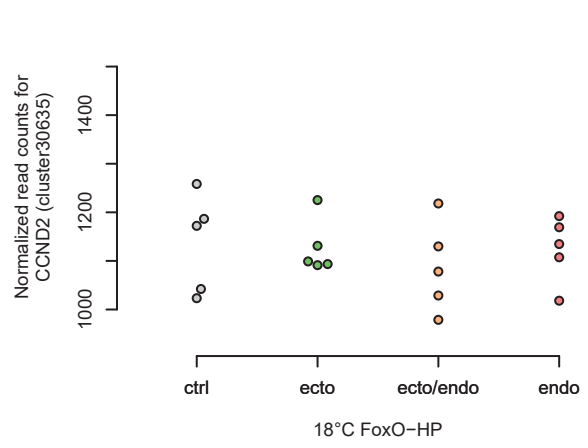**bf**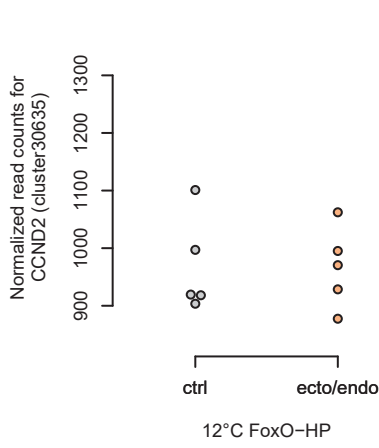**bg**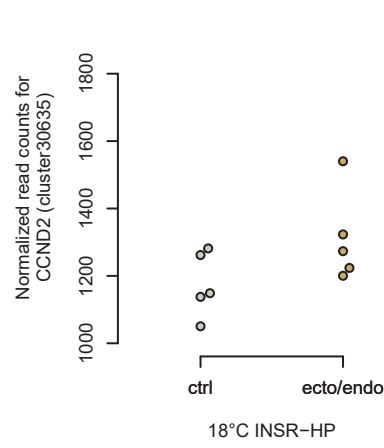**bh**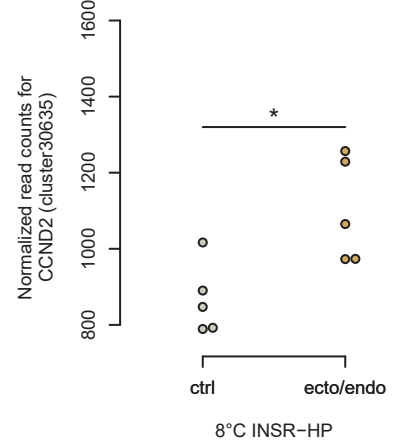





**bs**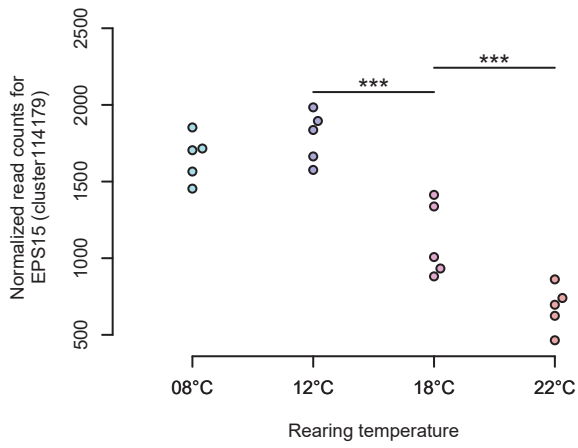**bt**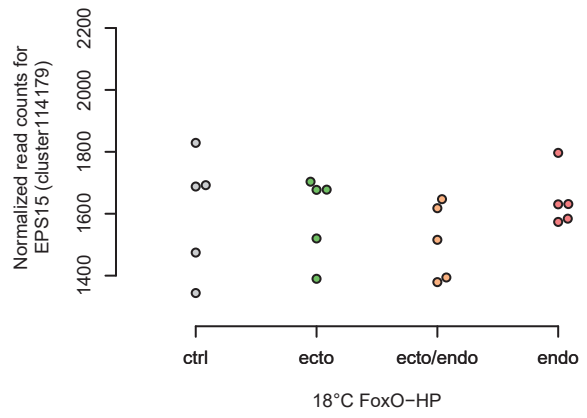**bu**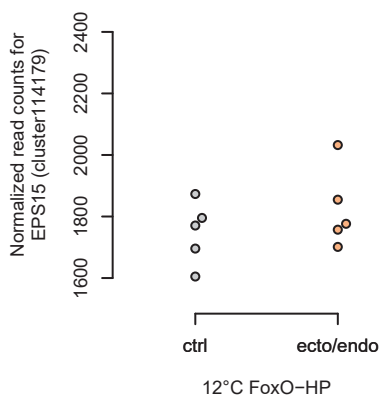**bv**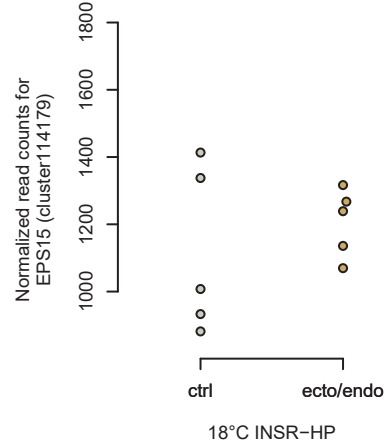**bw**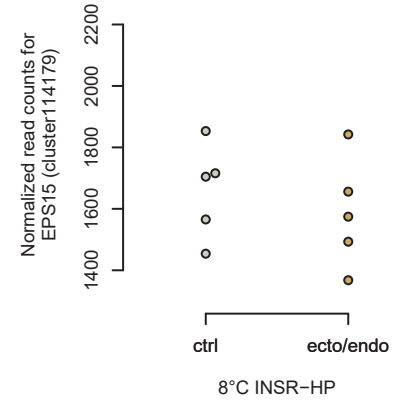**bx**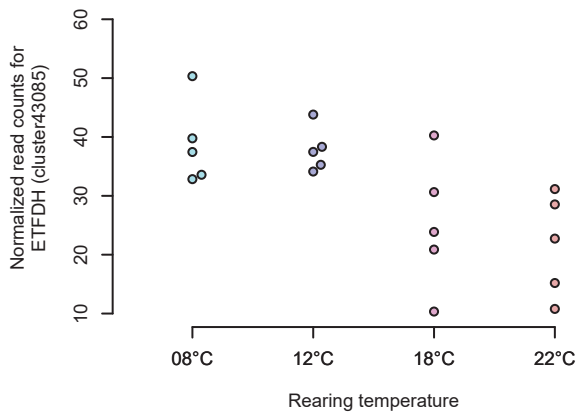**by**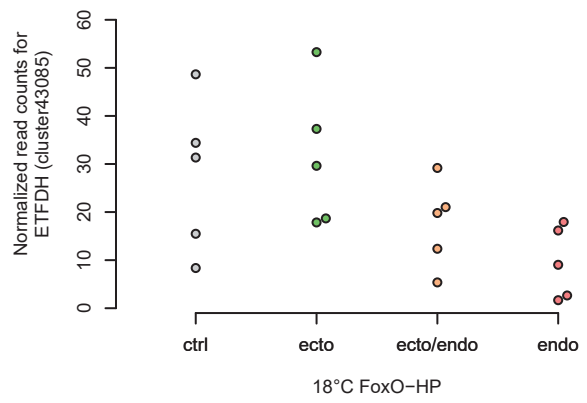**bz**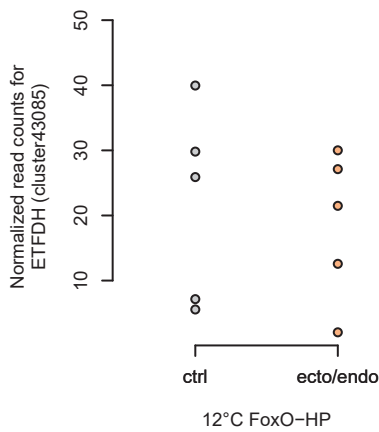**ca**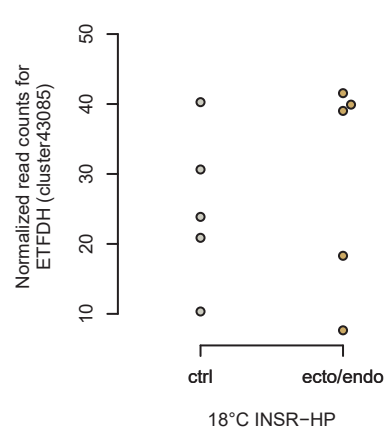**cb**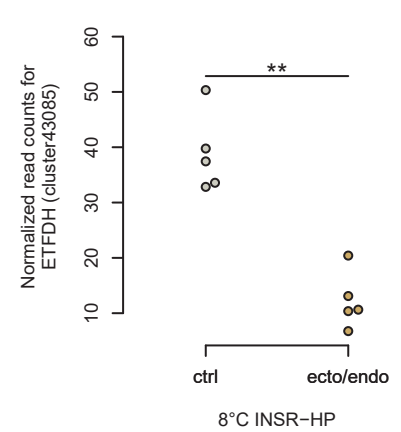

**cc**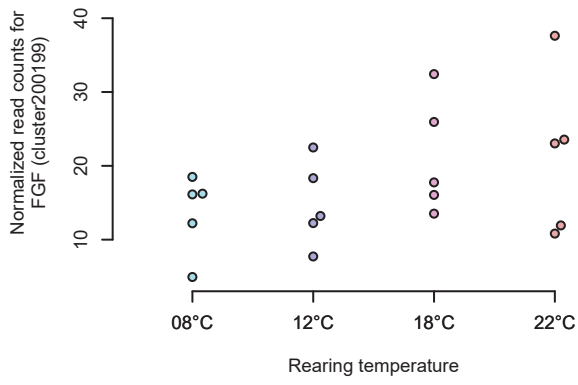**cd**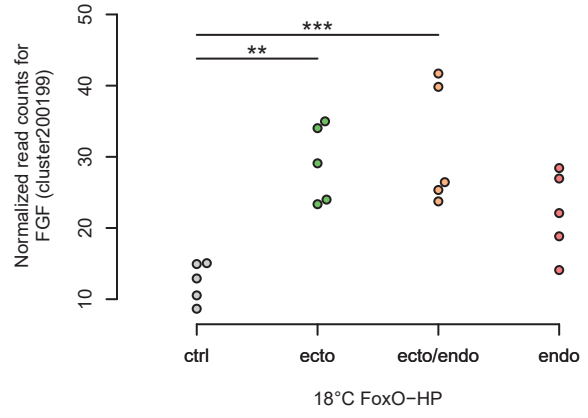**ce**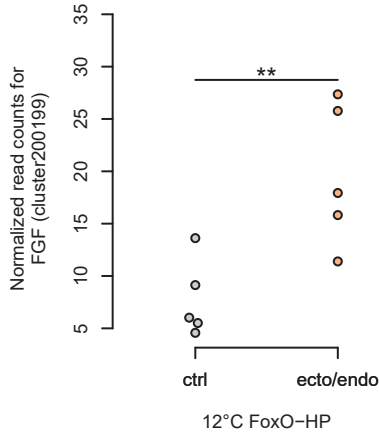**cf**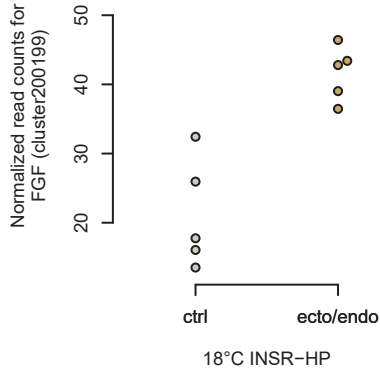**cg**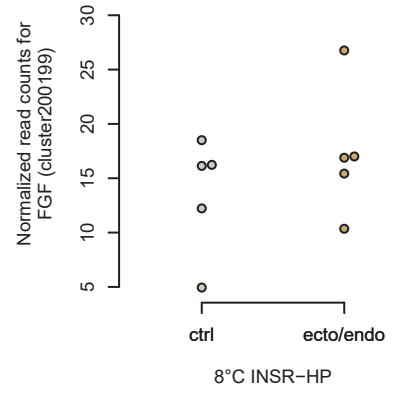**ch**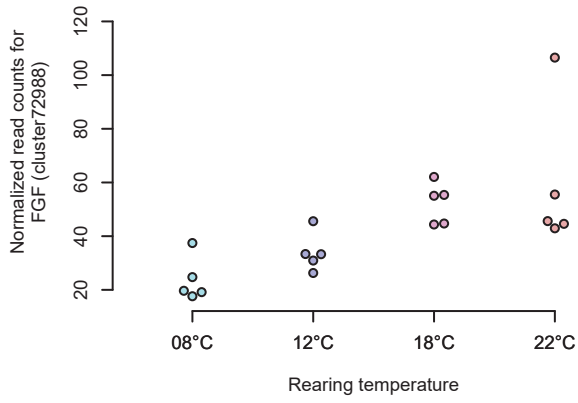**ci**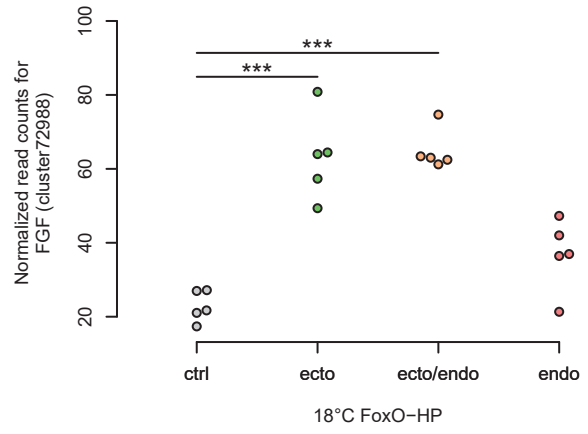**cj**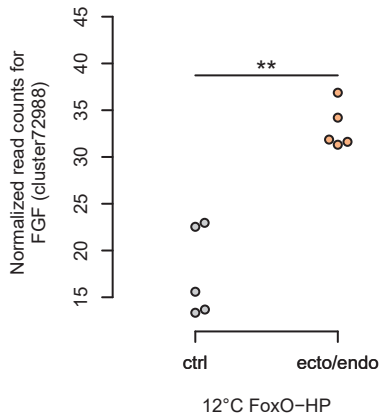**ck**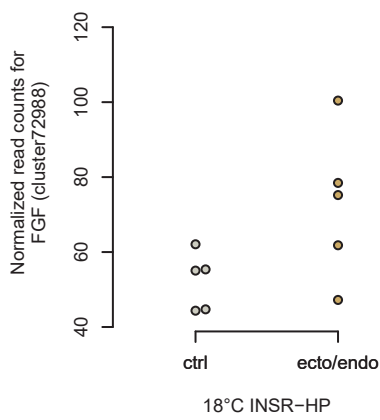**cl**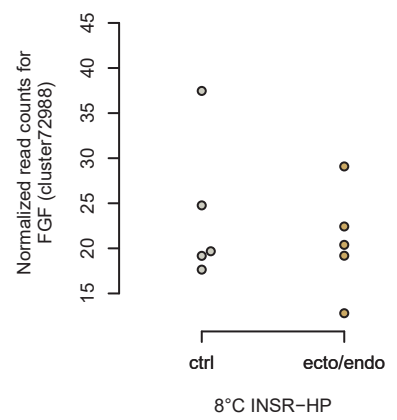

**cm**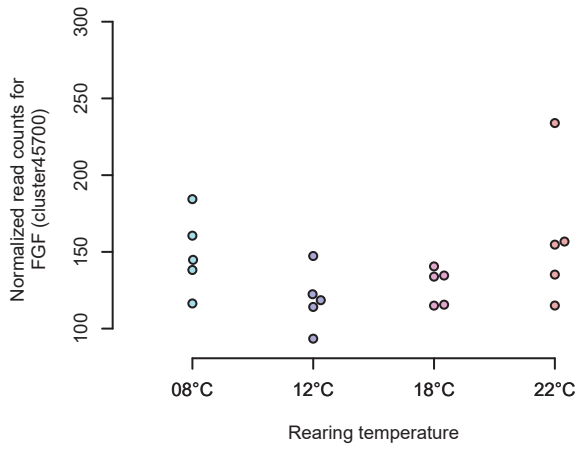**cn**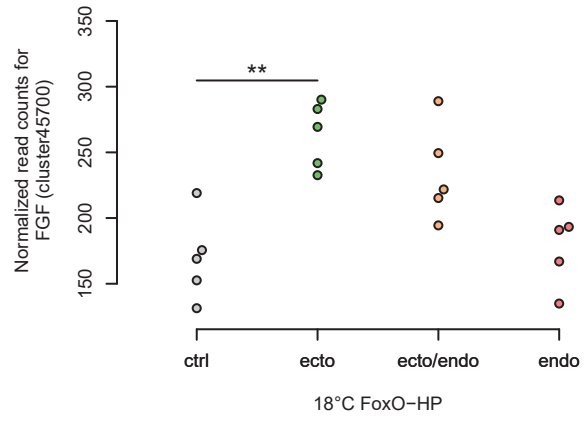**co**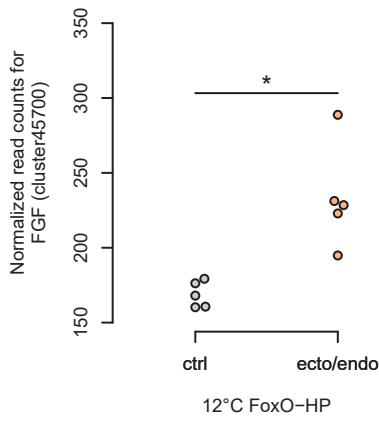**cp**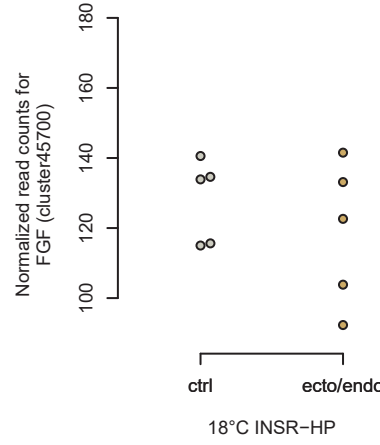**cq**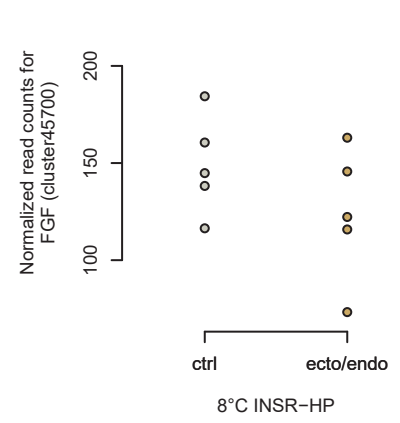**cr**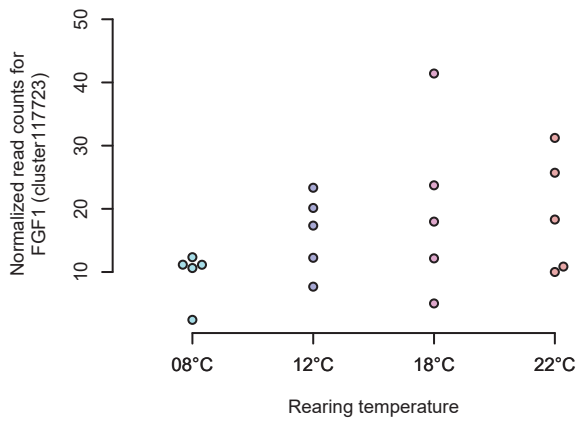**cs**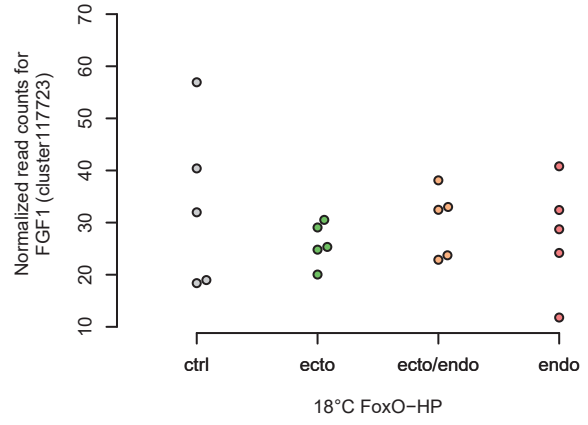**ct**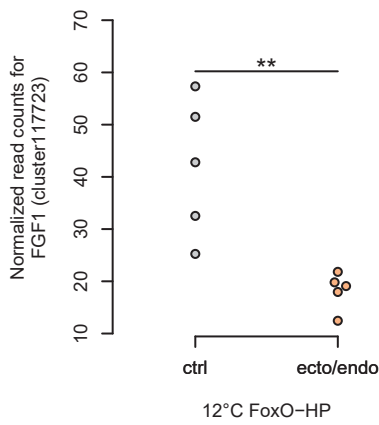**cu**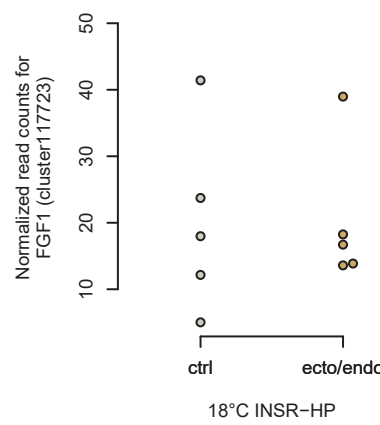**cv**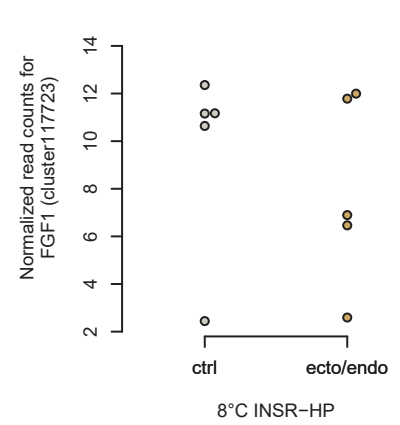

**CW**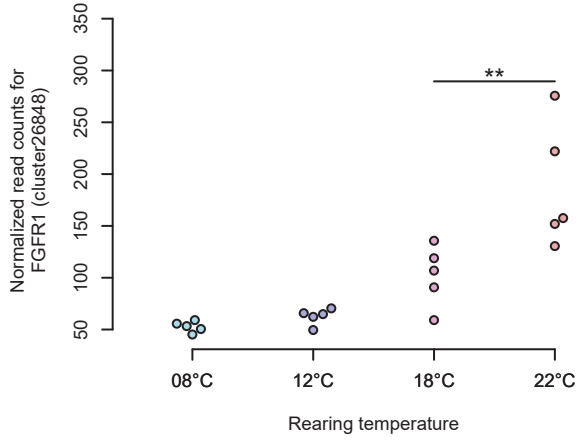**CX**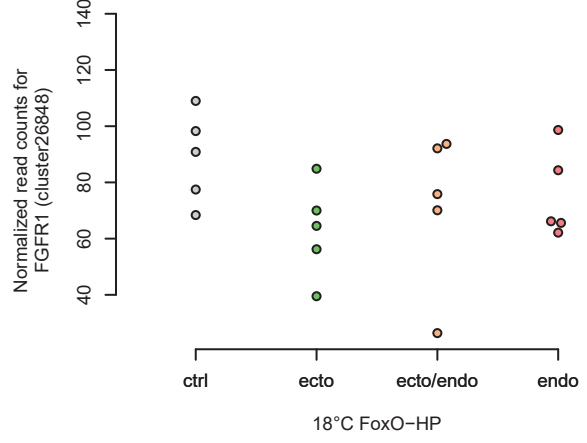**cy**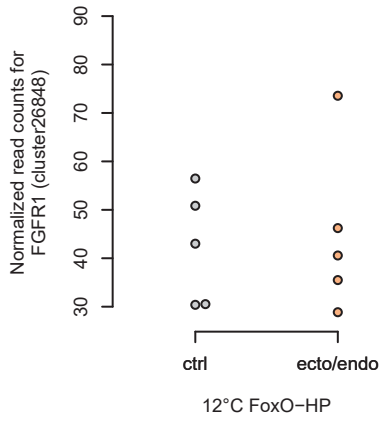**CZ**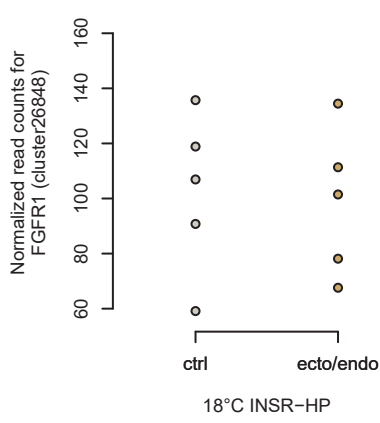**da**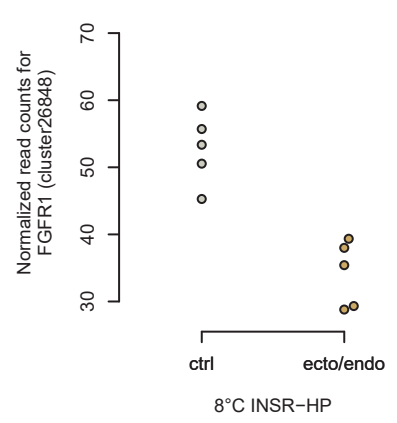**db**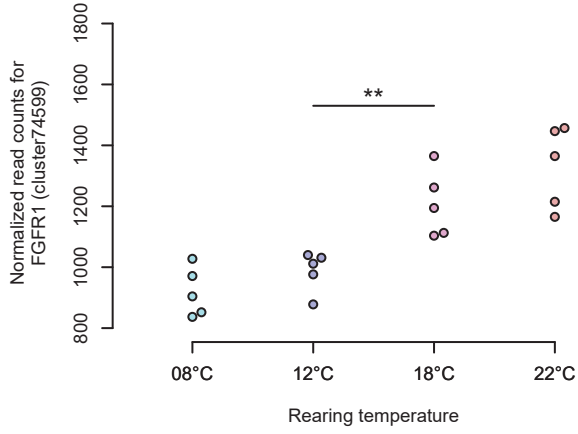**dc**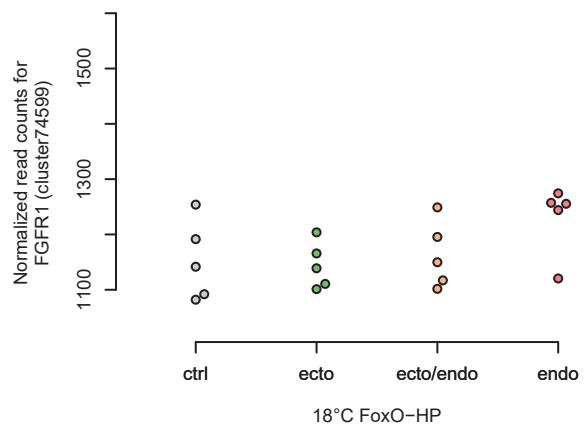**dd**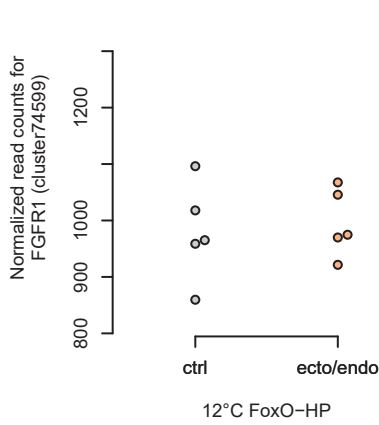**de**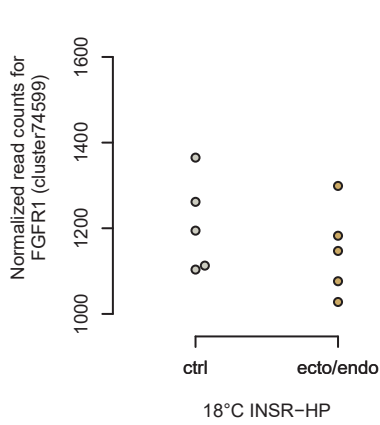**df**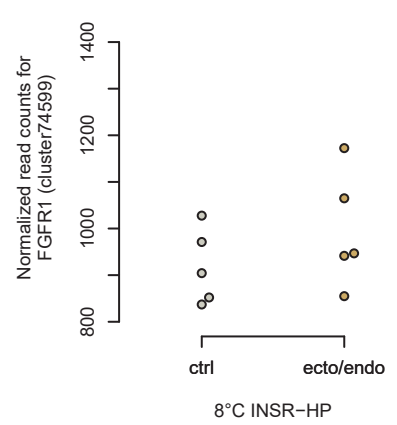

**dg**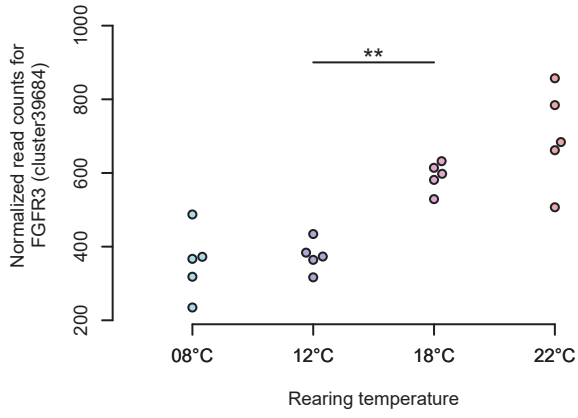**dh**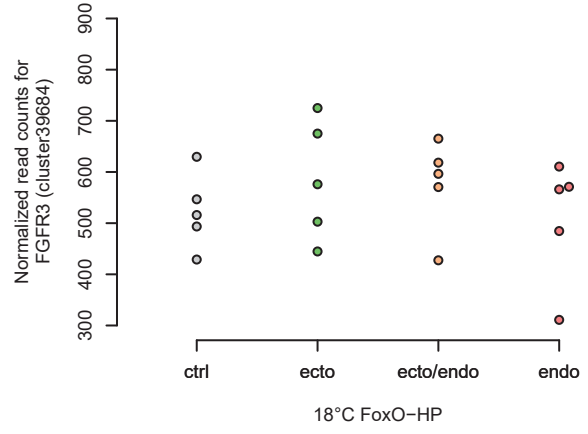**di**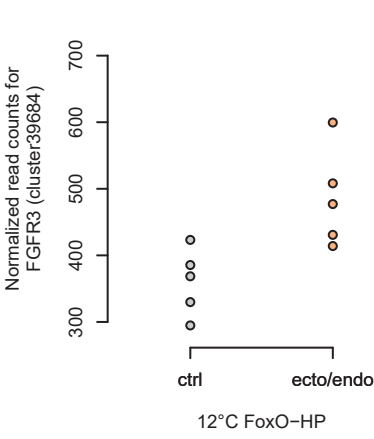**dj**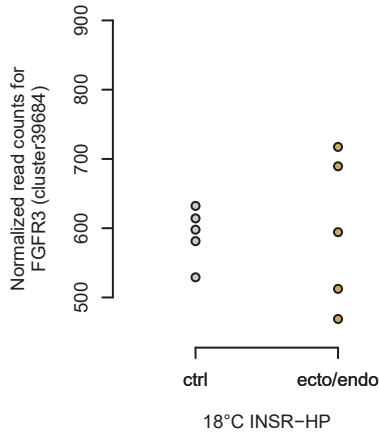**dk**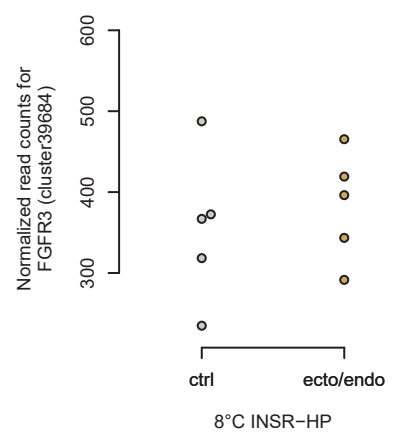**dl**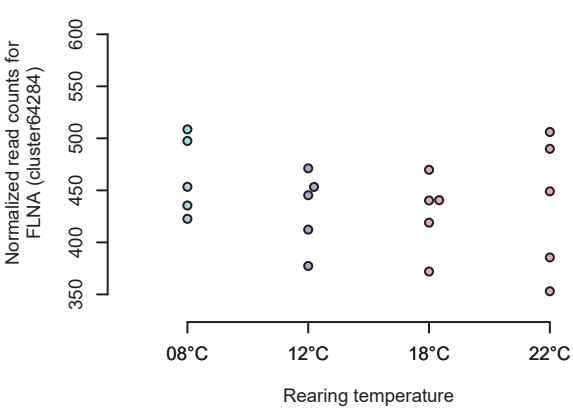**dm**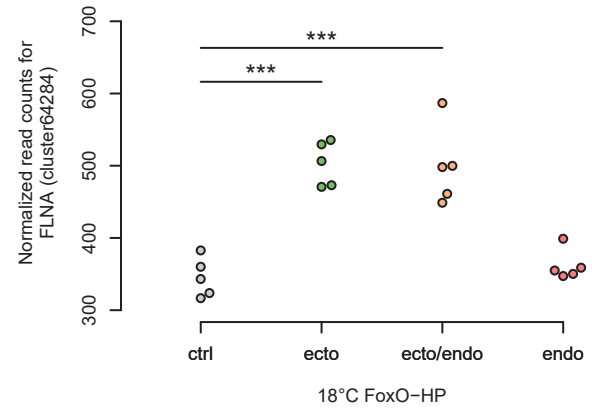**dn**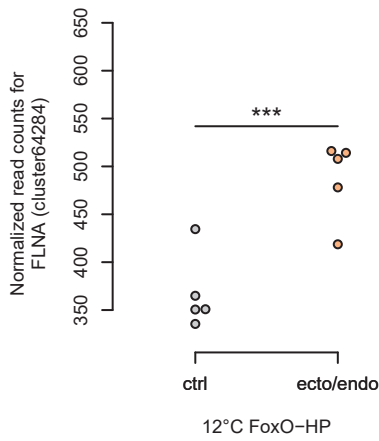**do**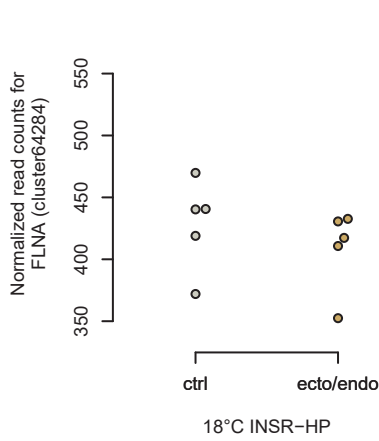**dp**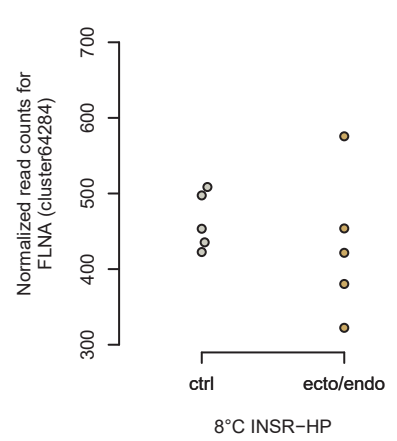

**dq**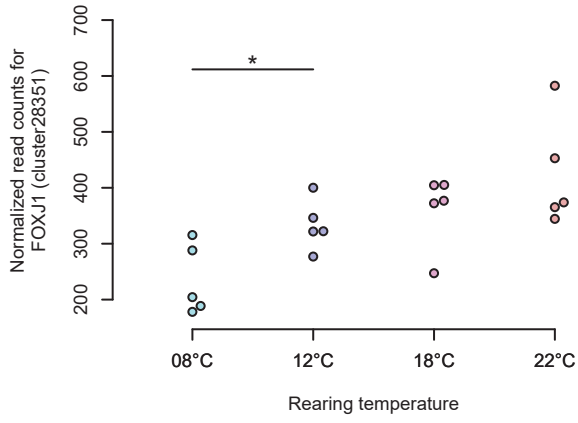**dr**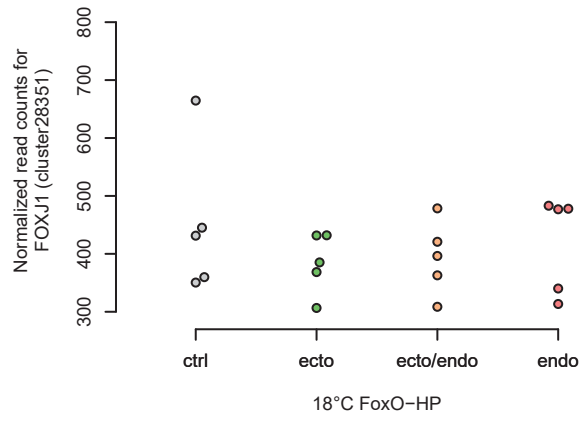**ds**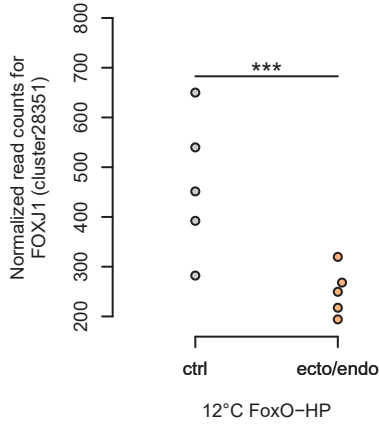**dt**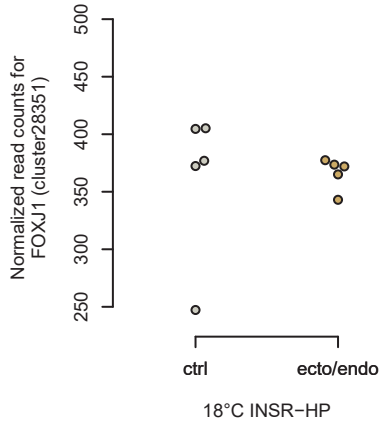**du**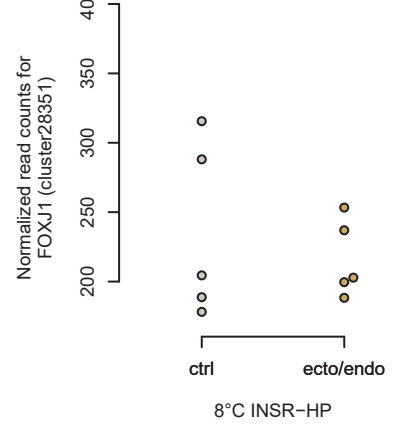**dv**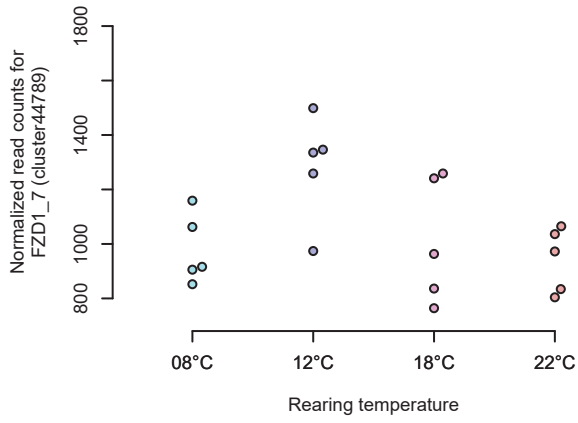**dw**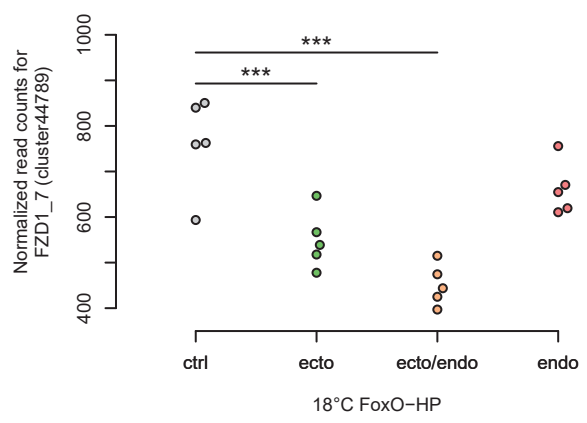**dx**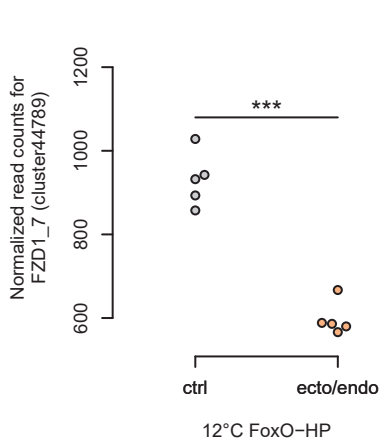**dy**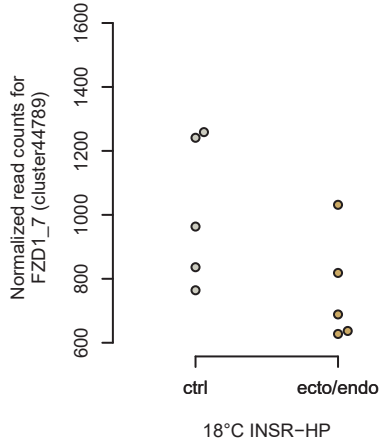**dz**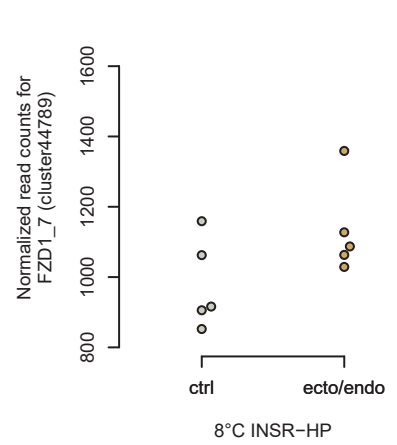

**ea**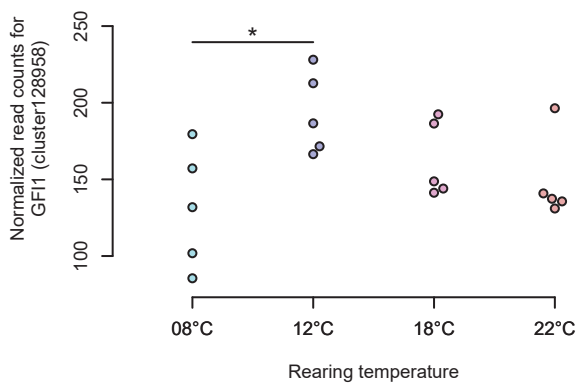**eb**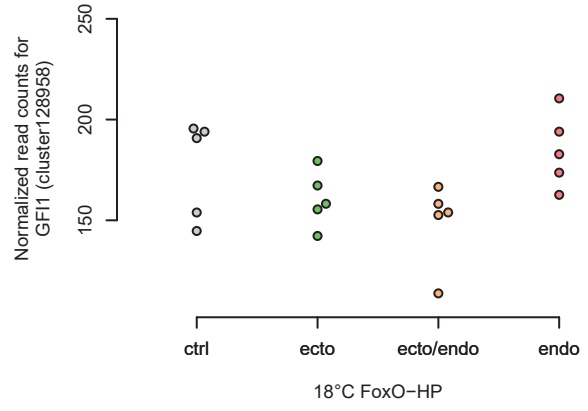**ec**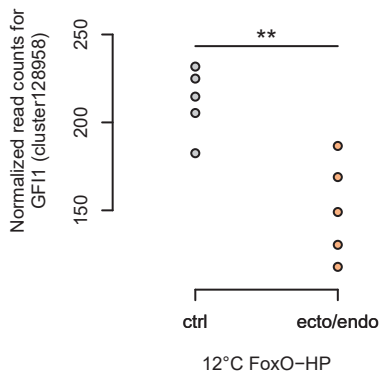**ed**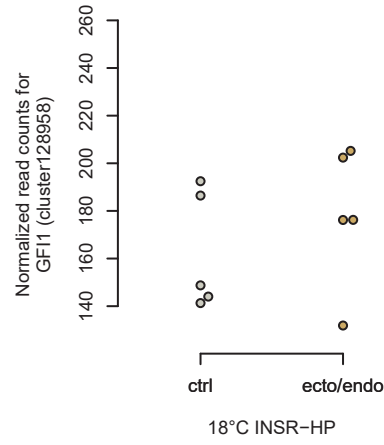**ee**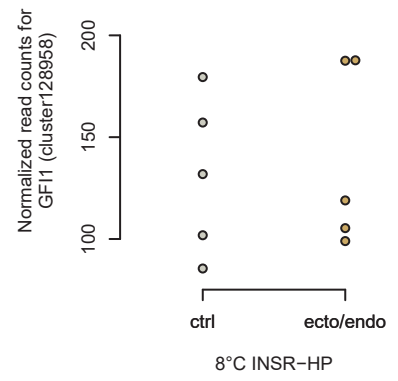**ef**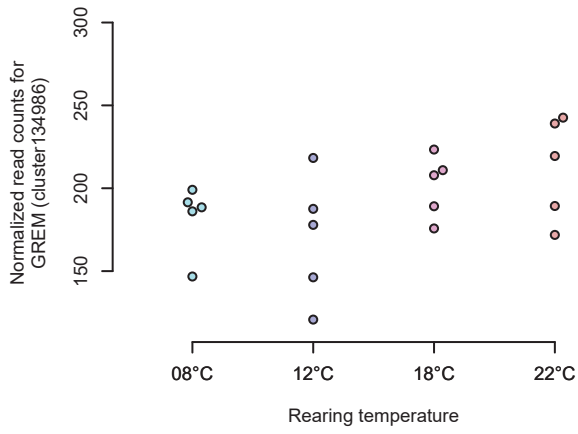**eg**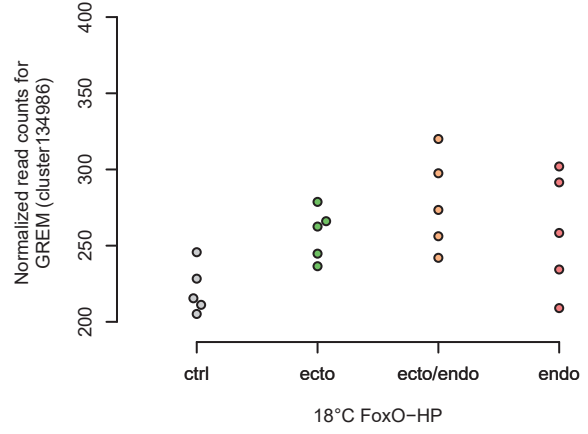**eh**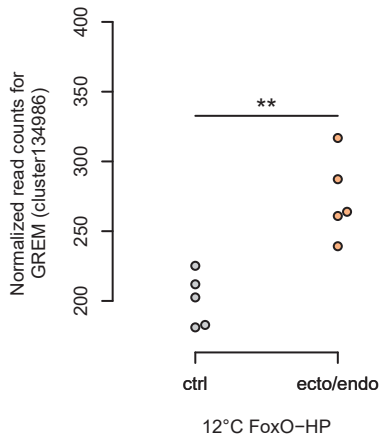**ei**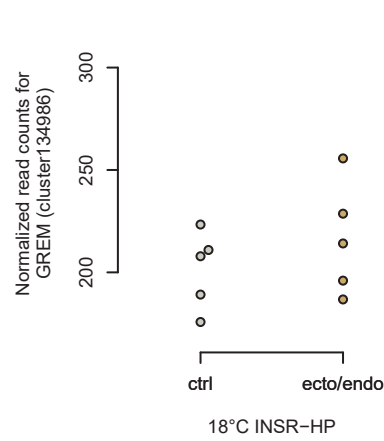**ej**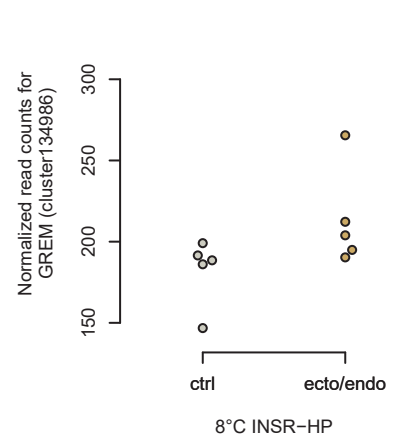

**ek**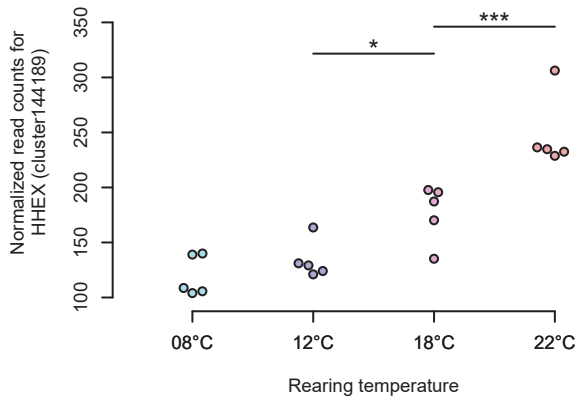**el**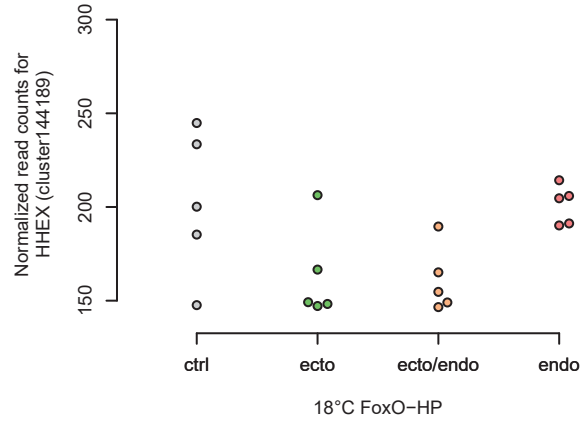**em**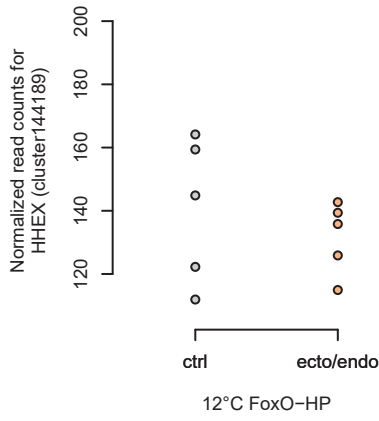**en**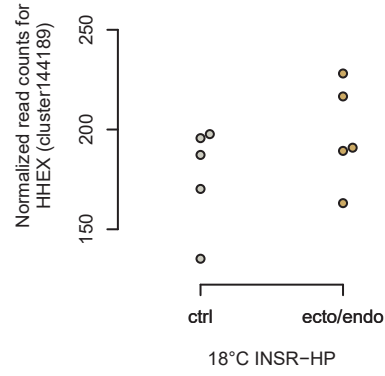**eo**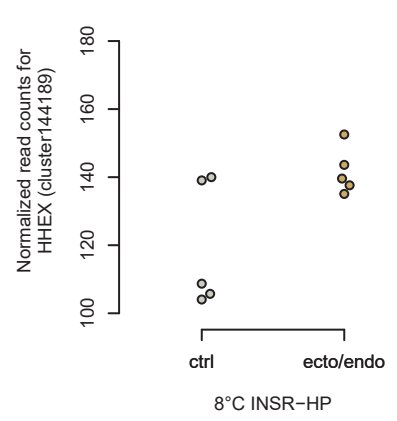**ep**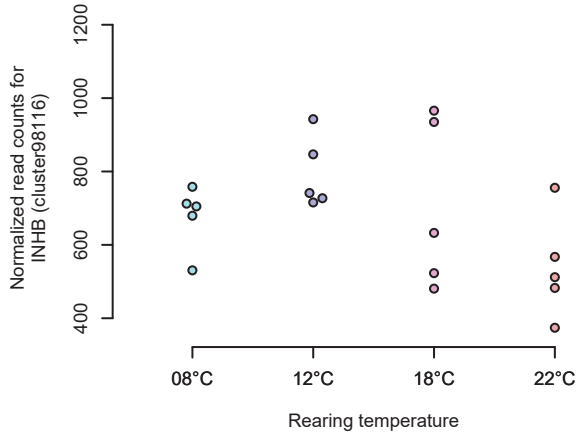**eq**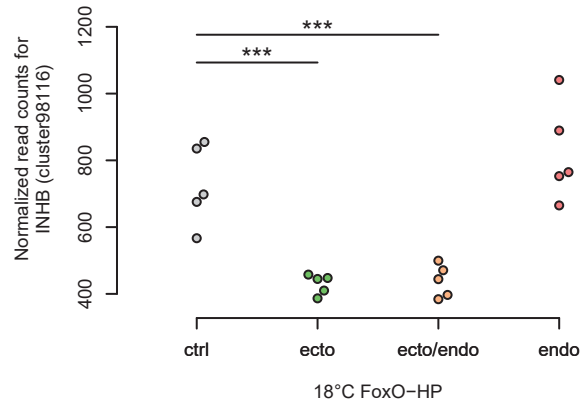**er**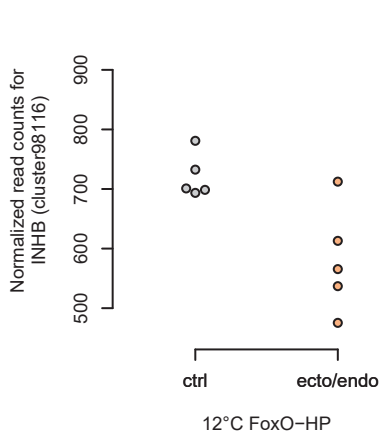**es**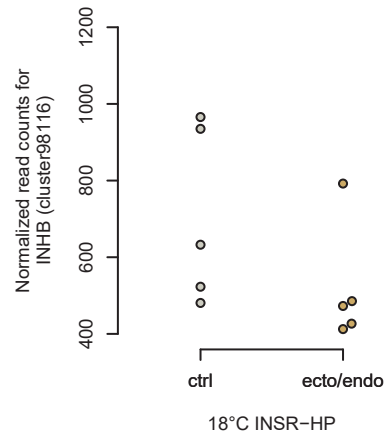**et**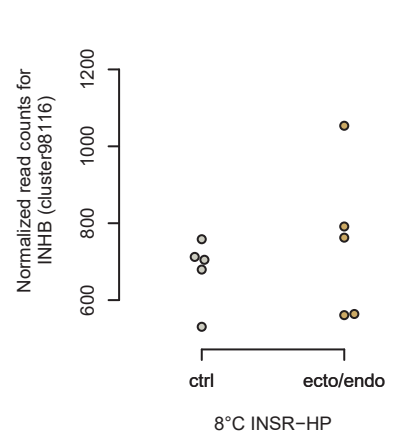



**eu**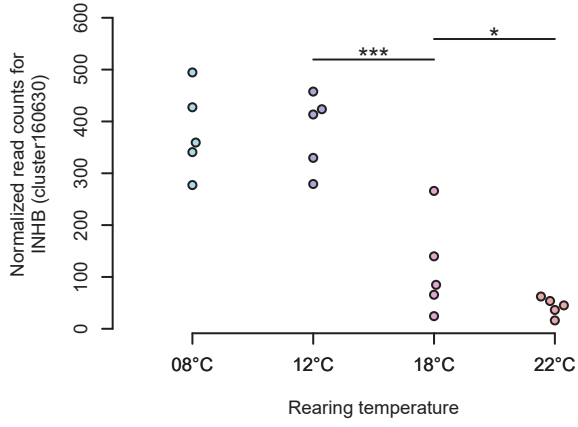**ev**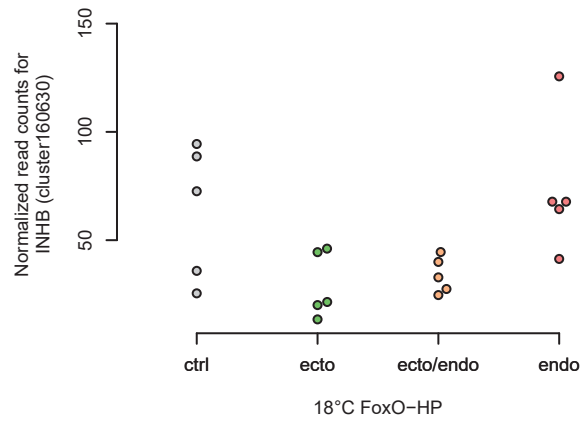**ew**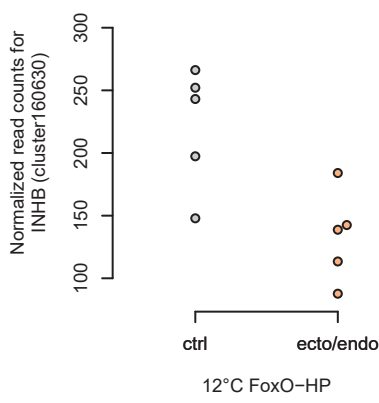**ex**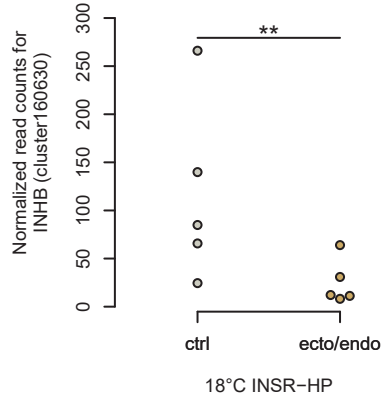**ey**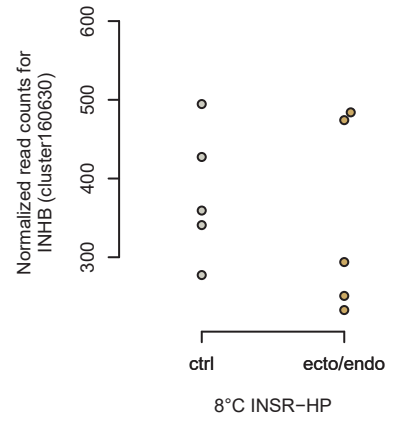**ez**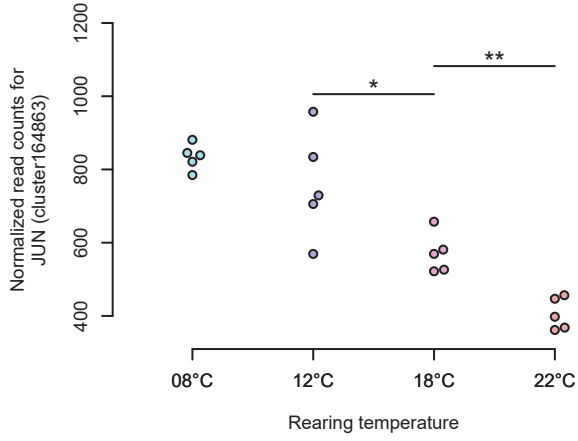**fa**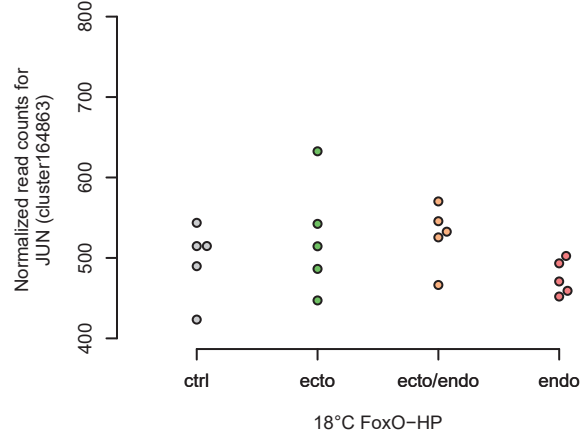**fb**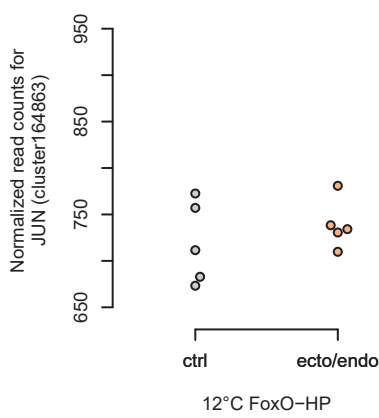**fc**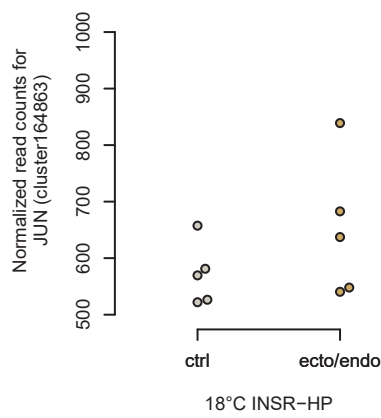**fd**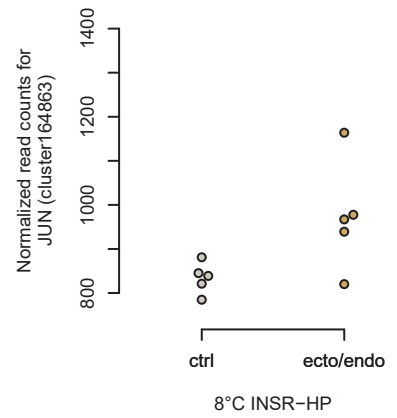

**fe**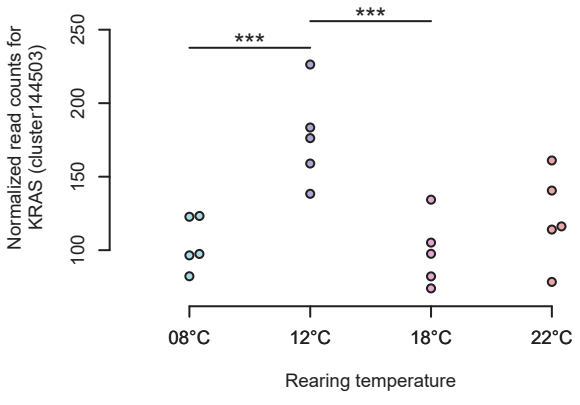**ff**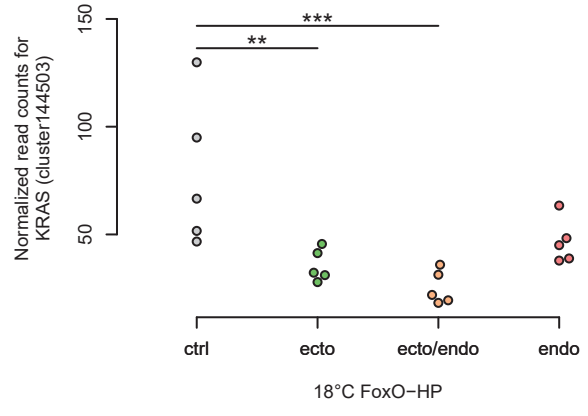**fg**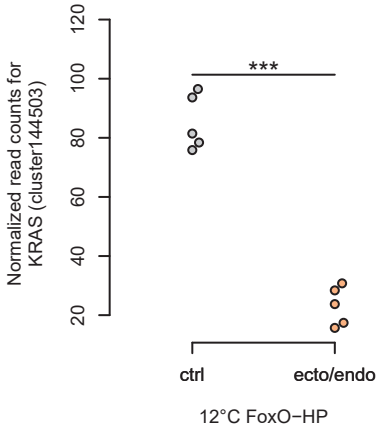**fh**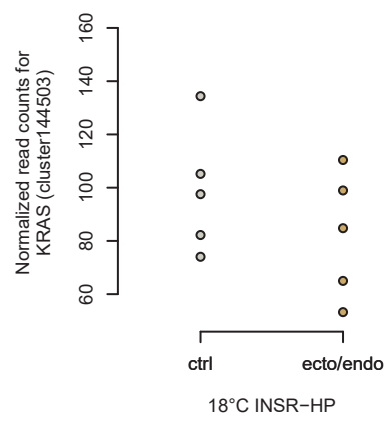**fi**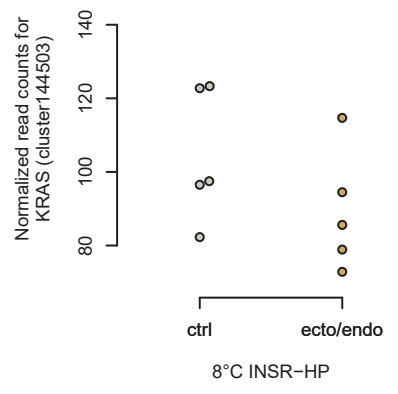**fj**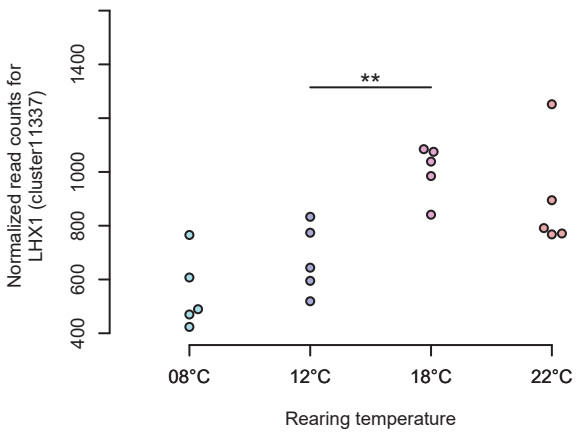**fk**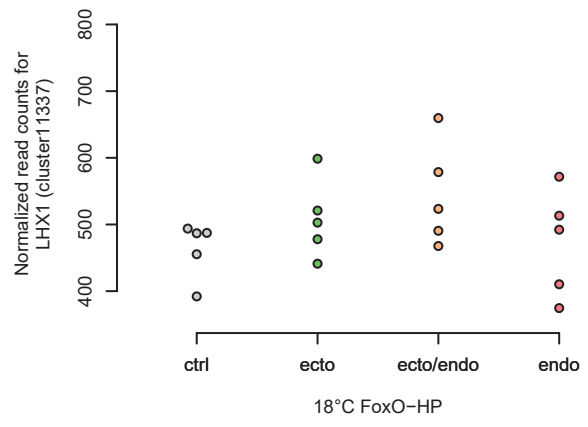**fl**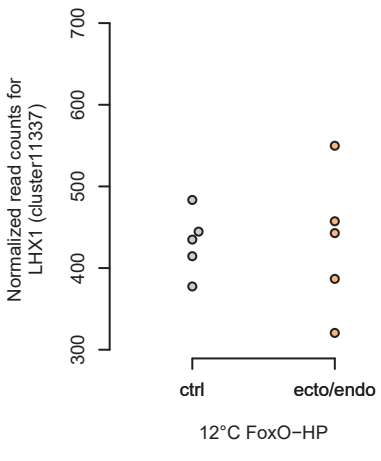**fm**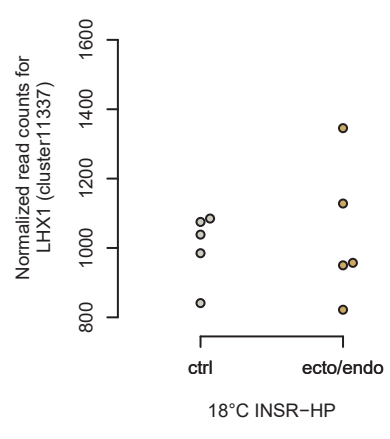**fn**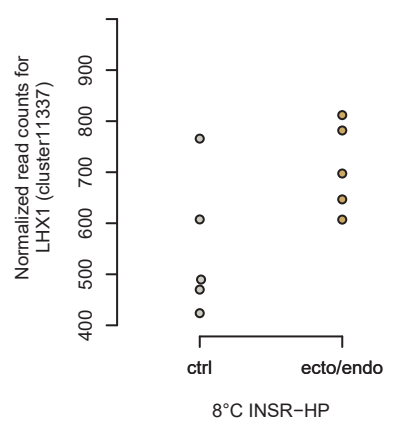

**fo**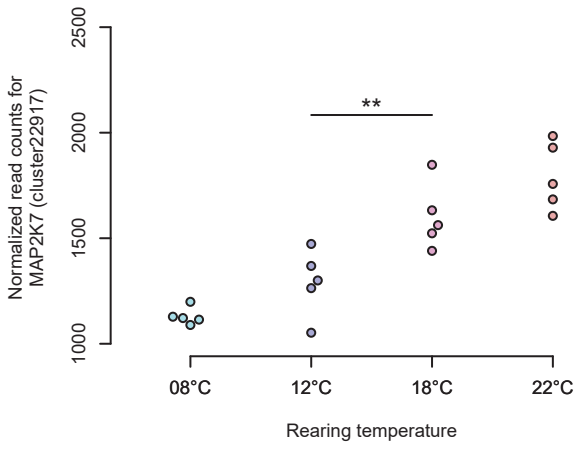**fp**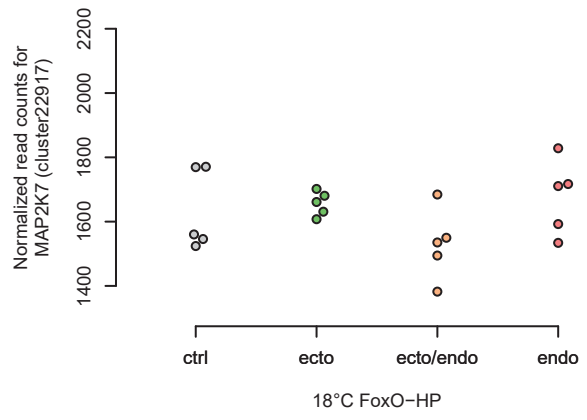**fq**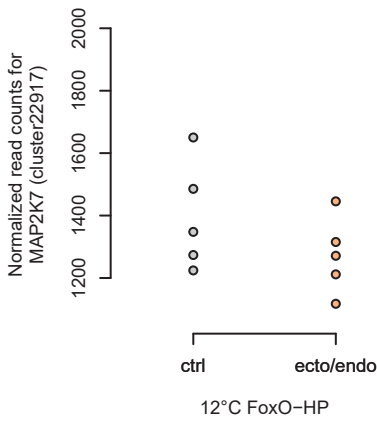**fr**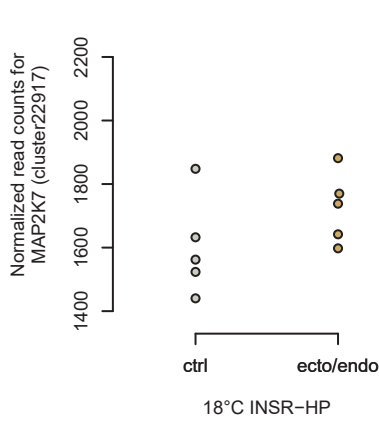**fs**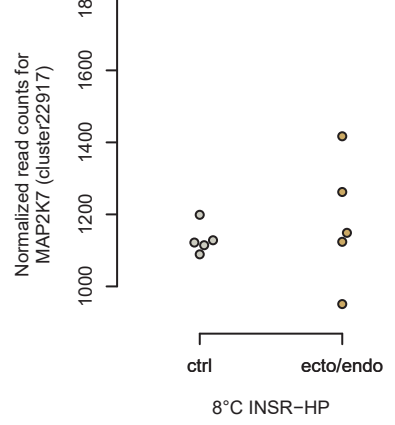**ft**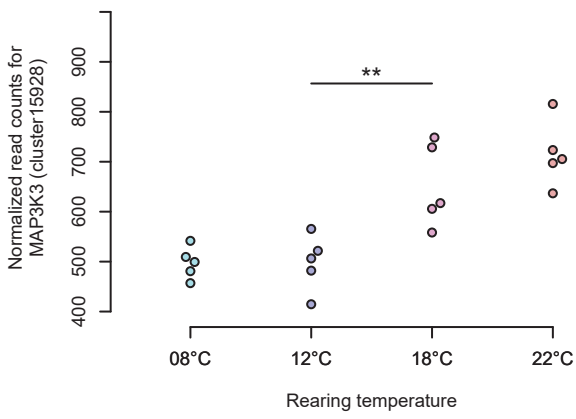**fu**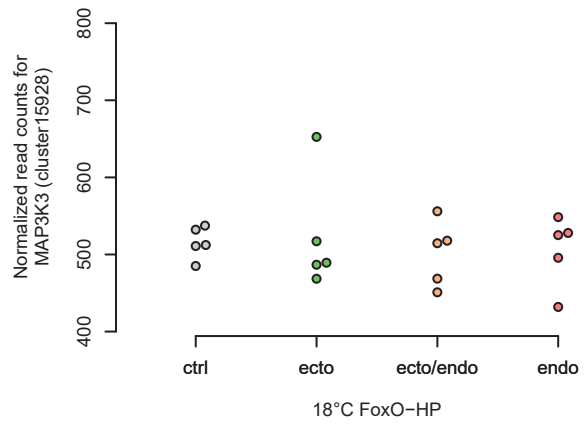**fv**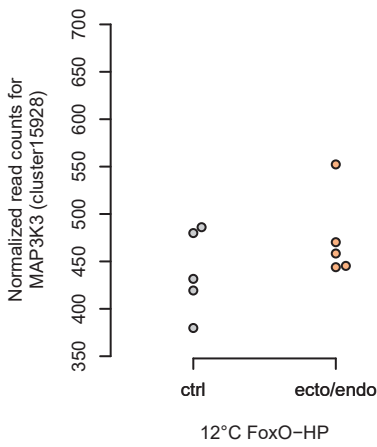**fw**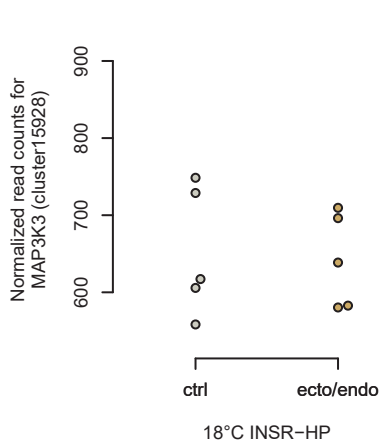**fx**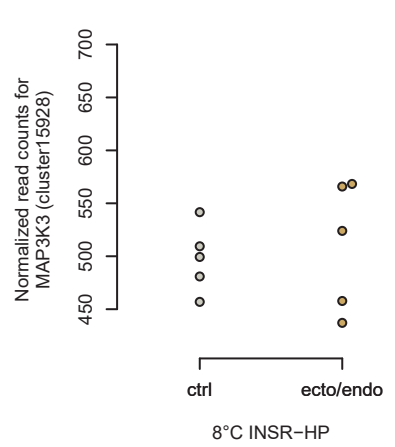



**gi**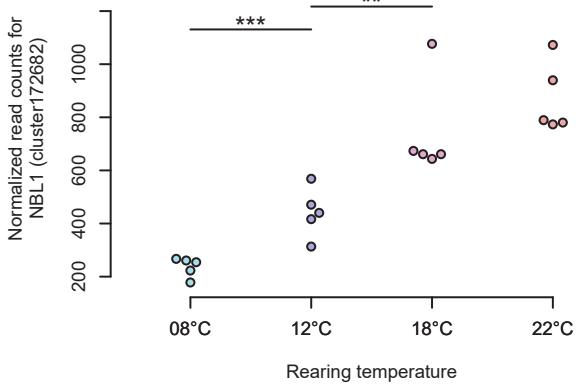**gj**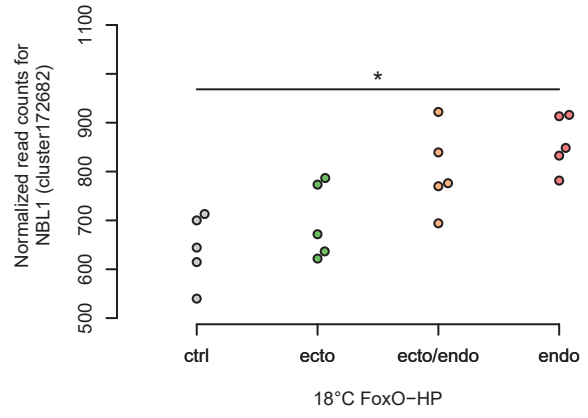**gk**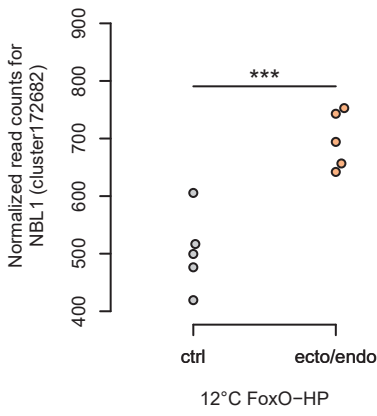**gl**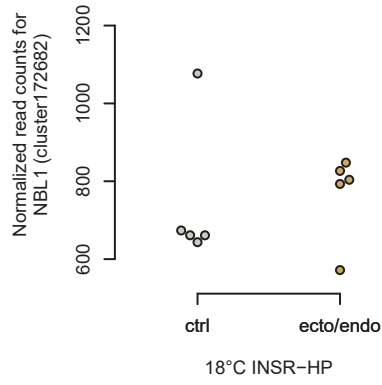**gm**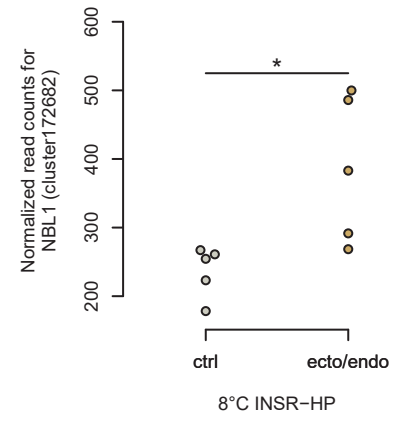**gn**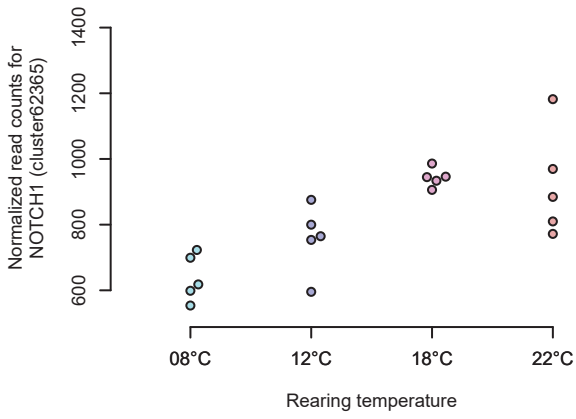**go**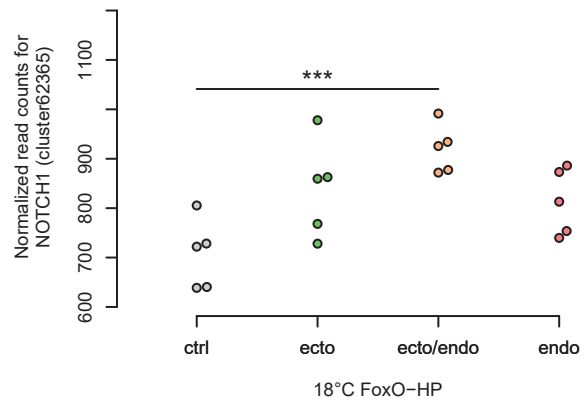**gp**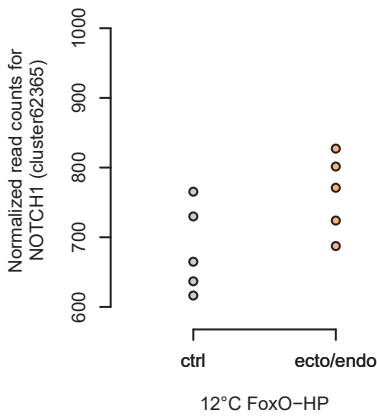**gq**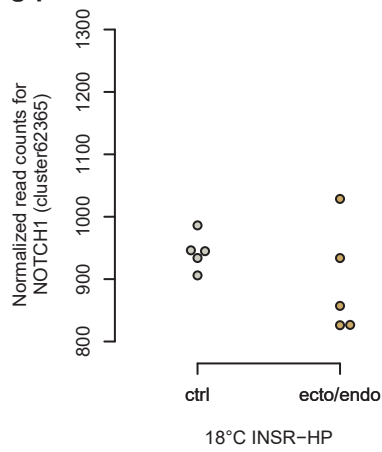**gr**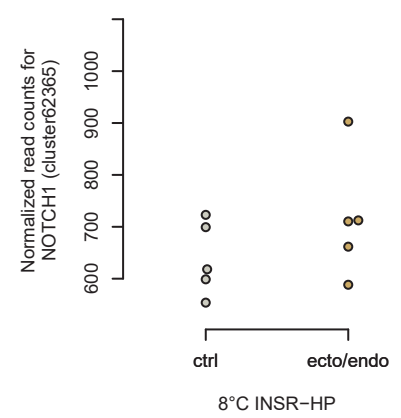

**gs**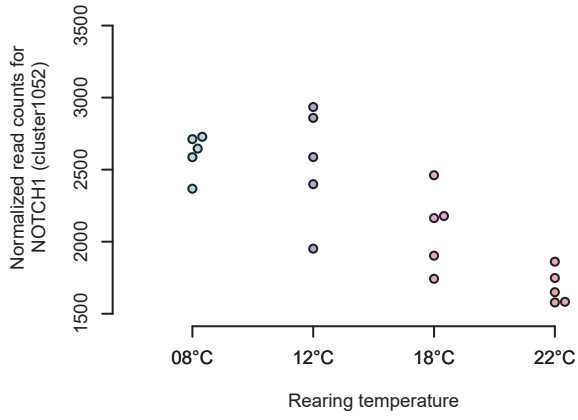**gt**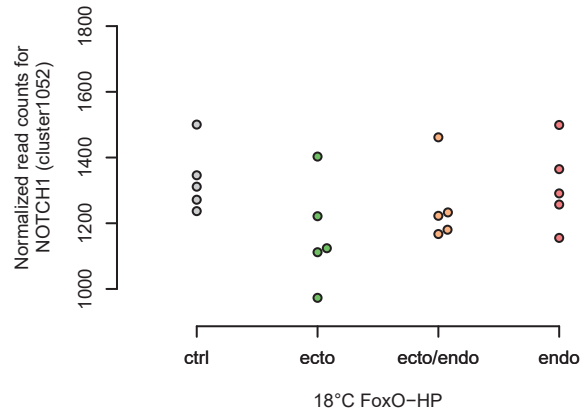**gu**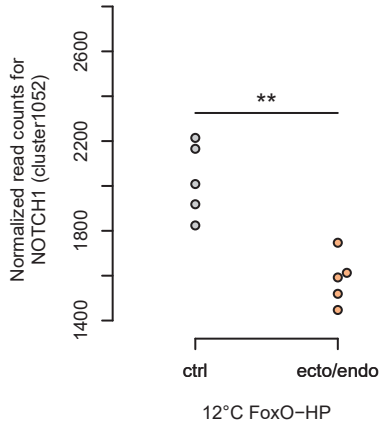**gv**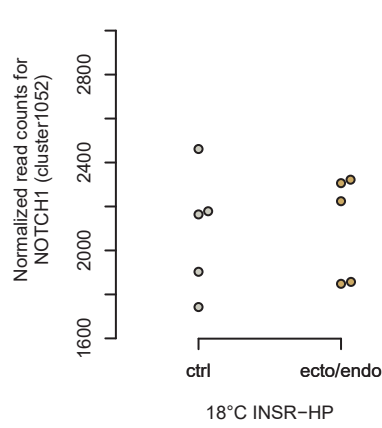**gw**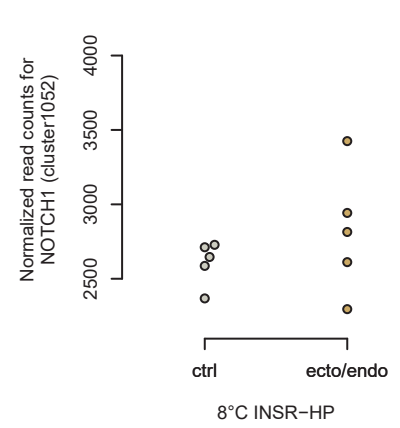**gx**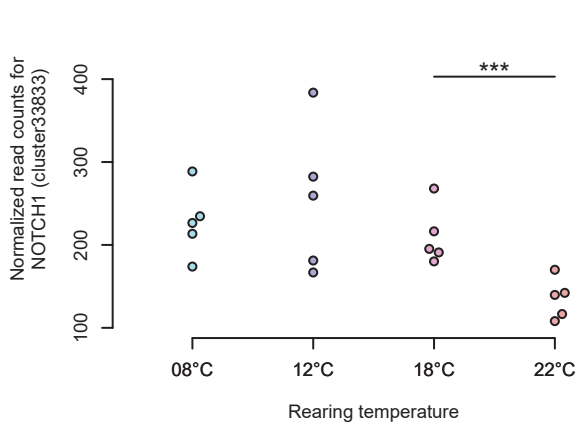**gy**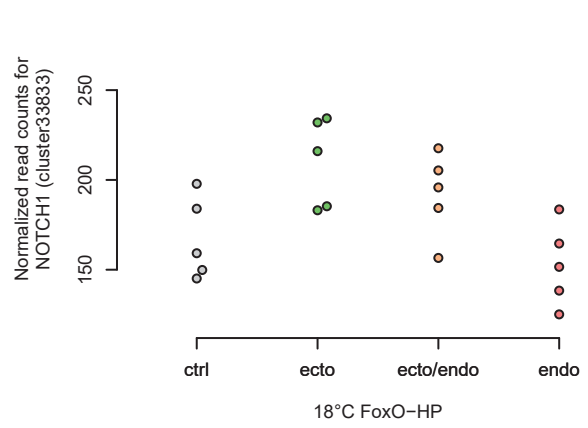**gz**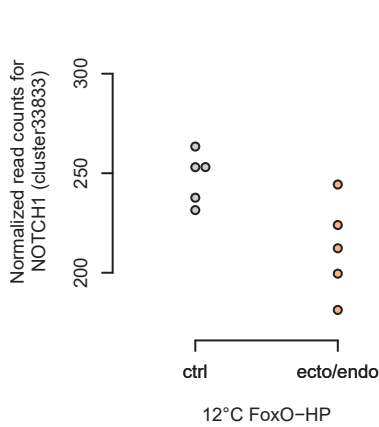**ha**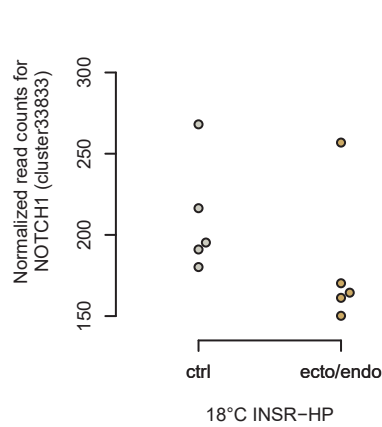**hb**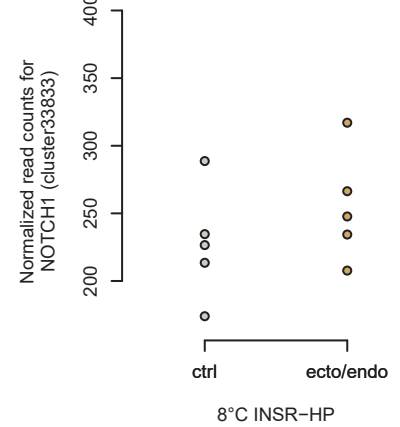

**hc**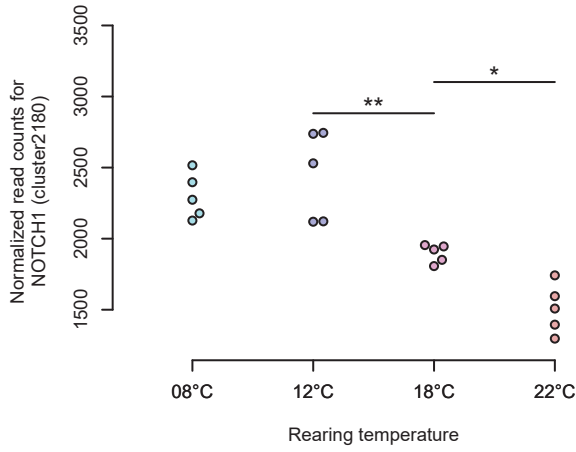**hd**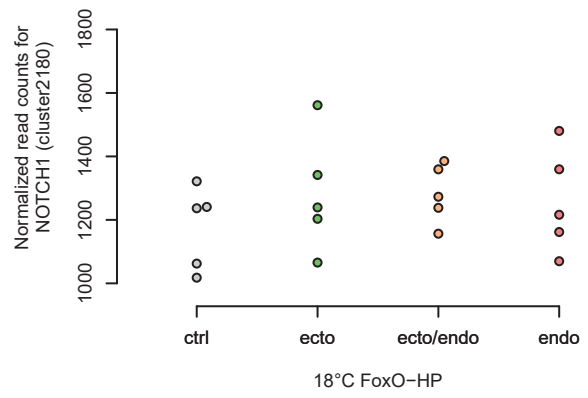**he**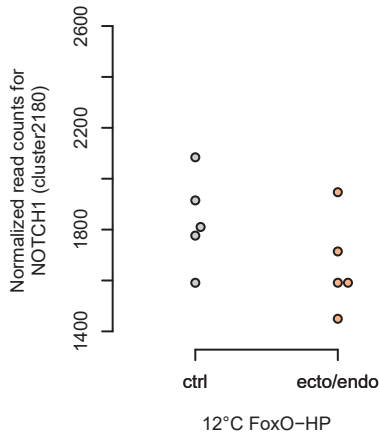**hf**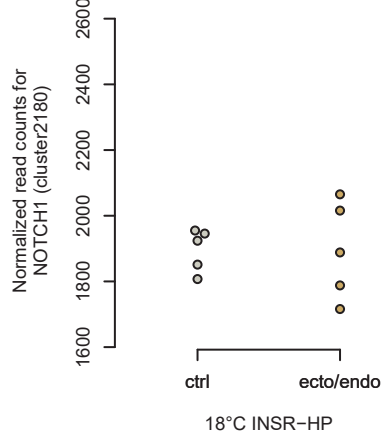**hg**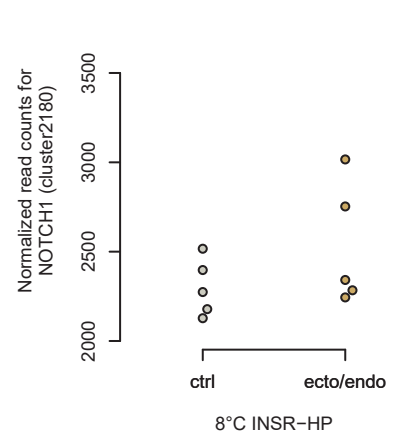**hh**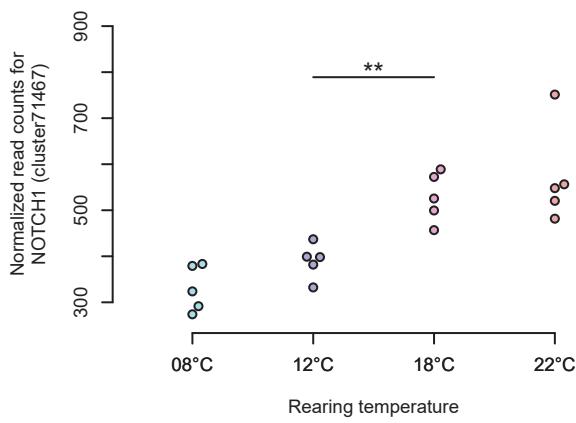**hi**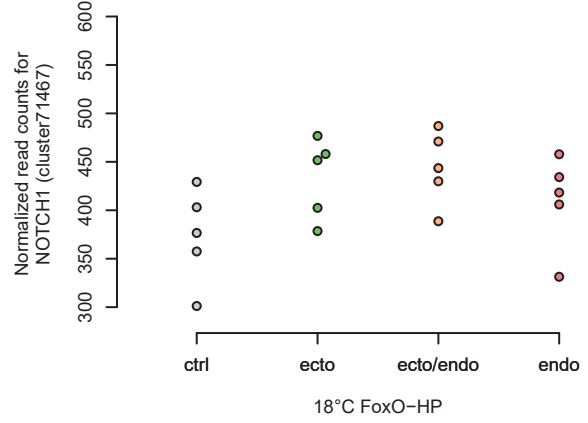**hj**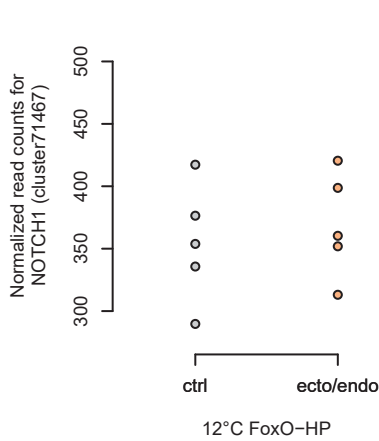**hk**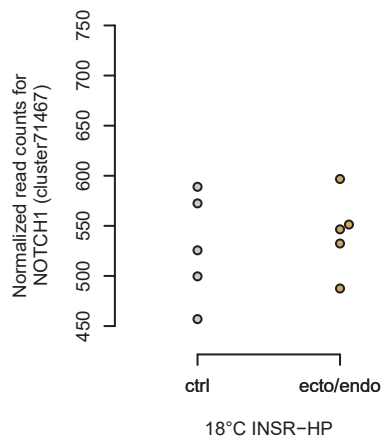**hl**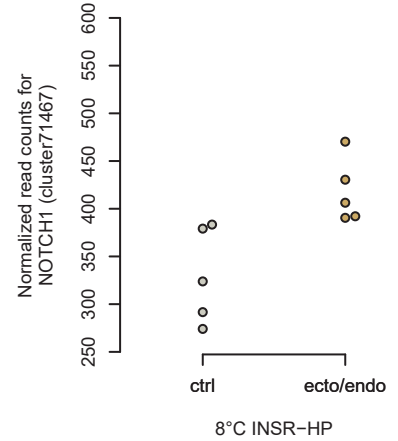

**hm**

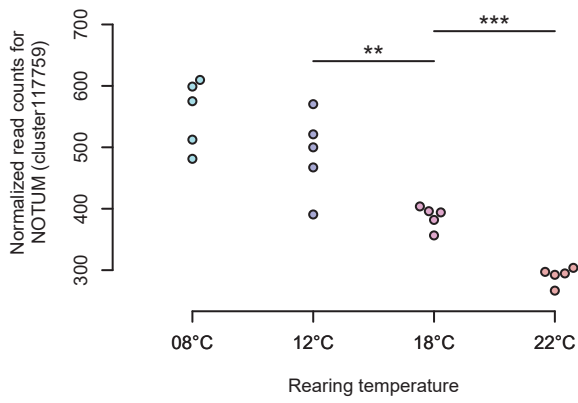

**hn**

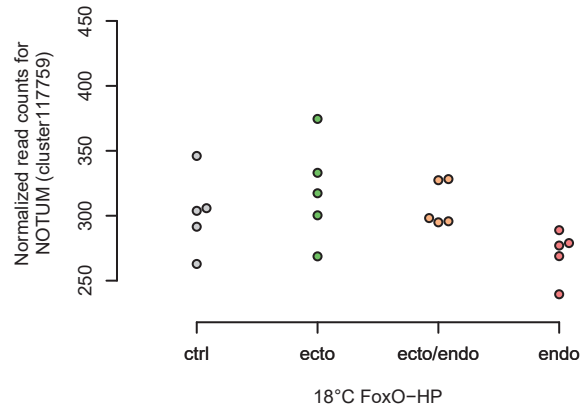

**ho**

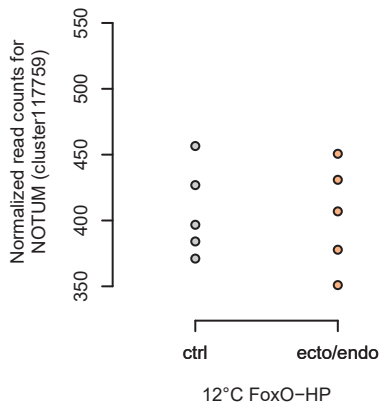

**hp**

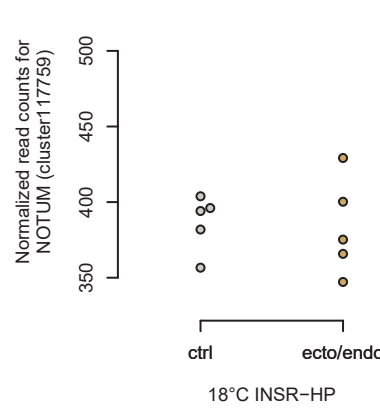

**hq**

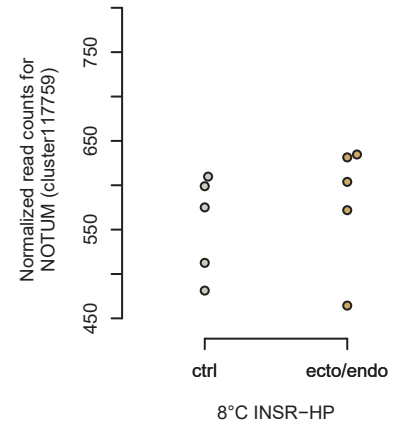

**hr**

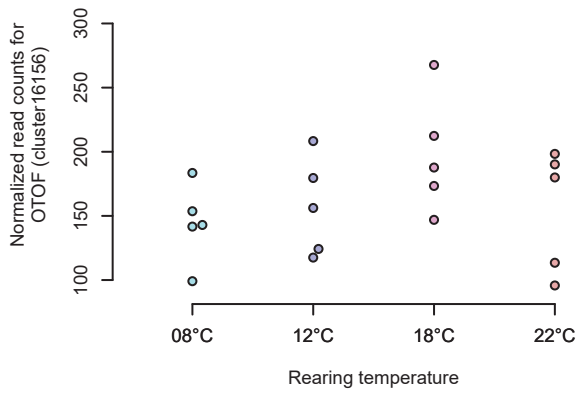

**hs**

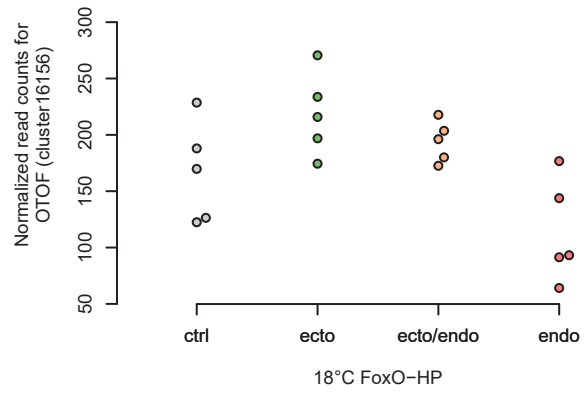

**ht**

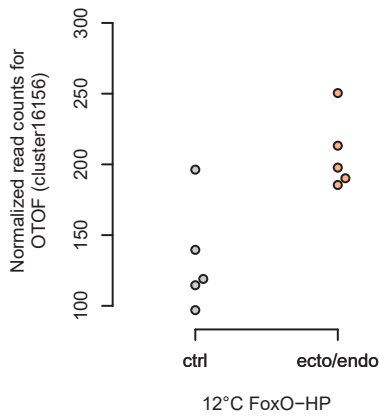

**hu**

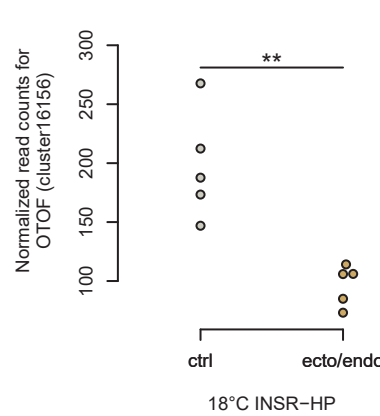

**hv**

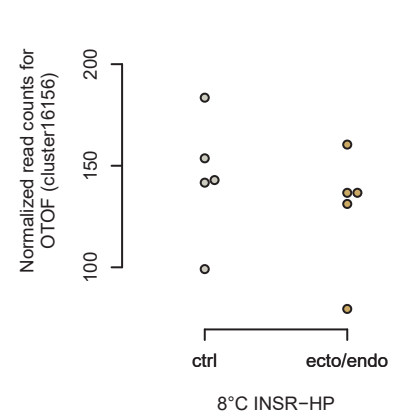





**ig**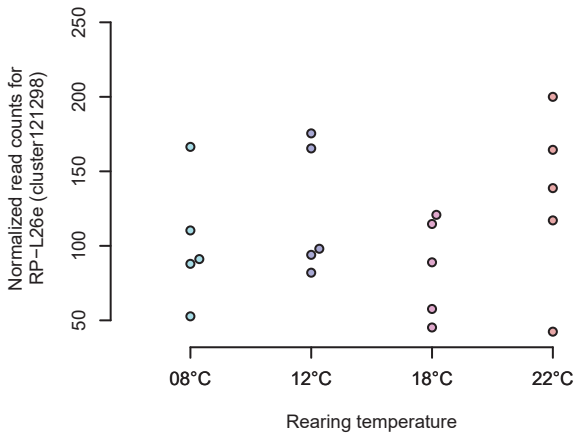**ih**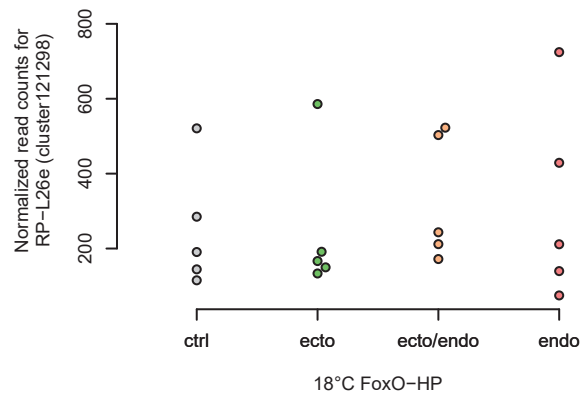**ii**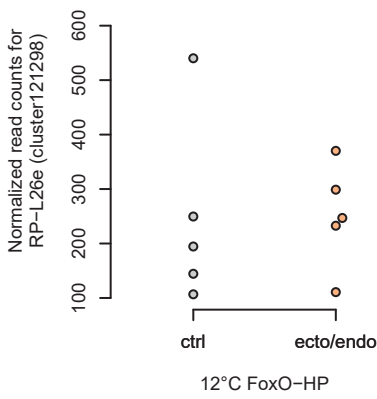**ij**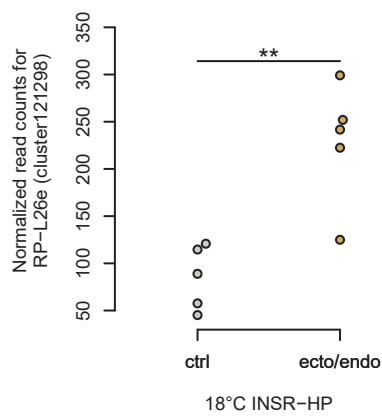**ik**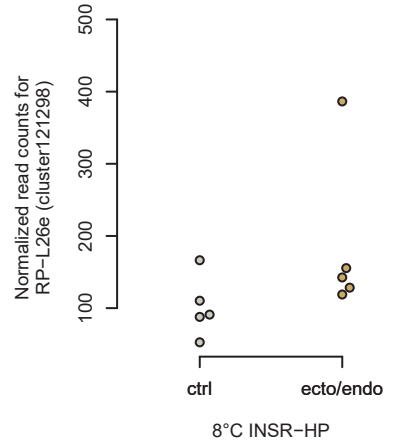**il**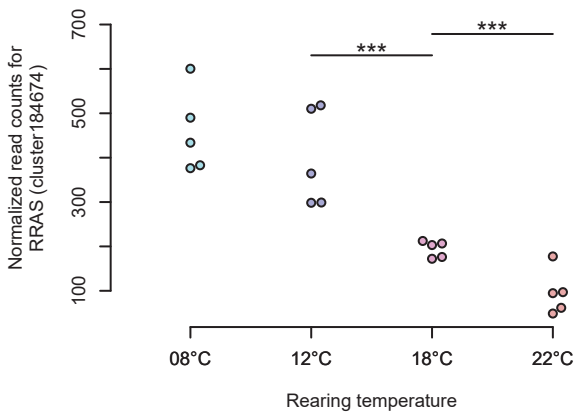**im**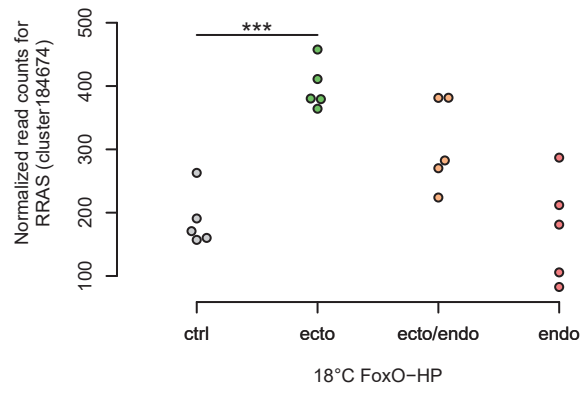**in**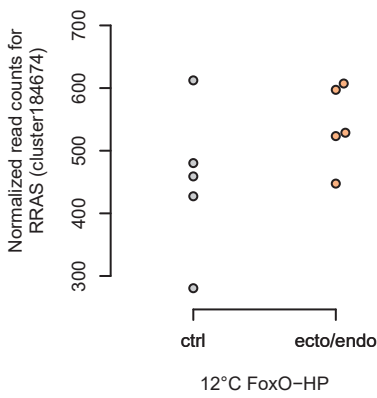**io**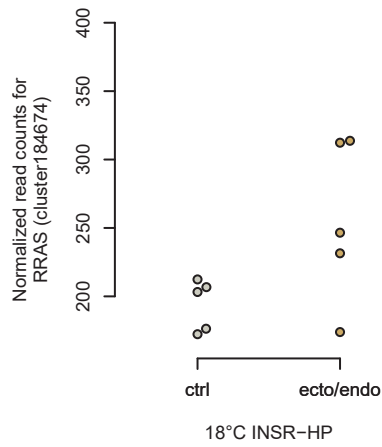**ip**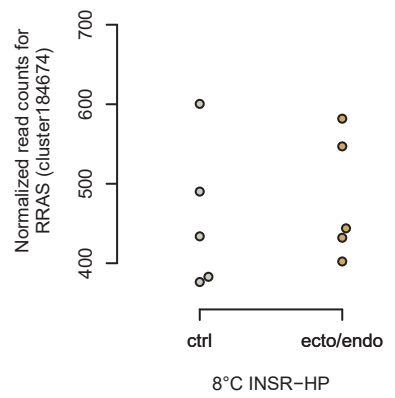

**iq**

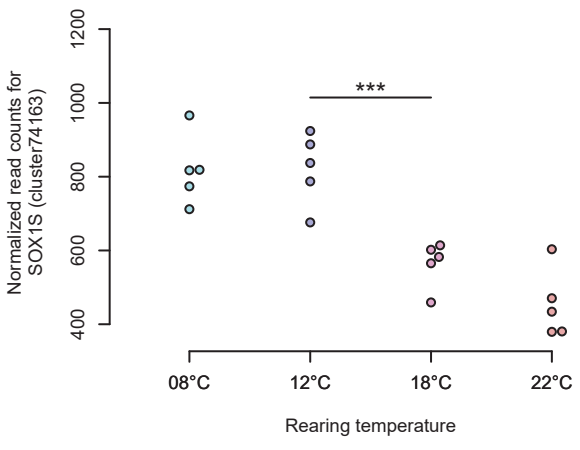

**ir**

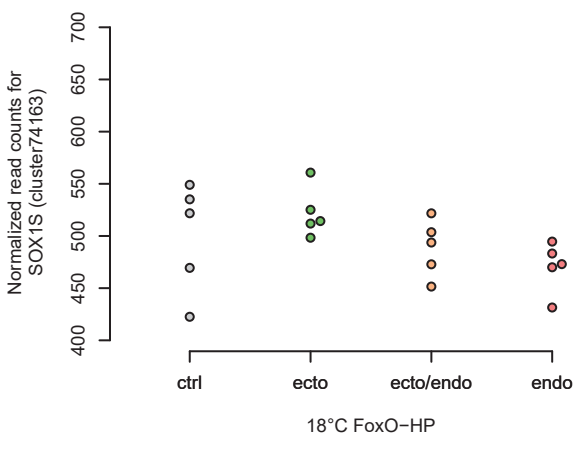

**is**

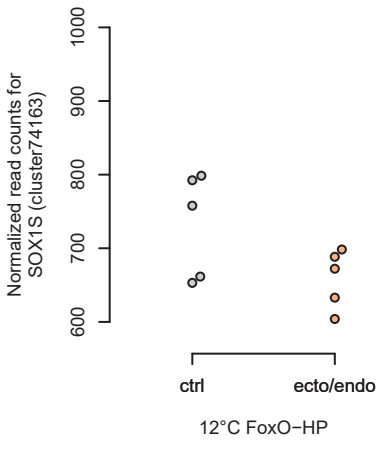

**it**

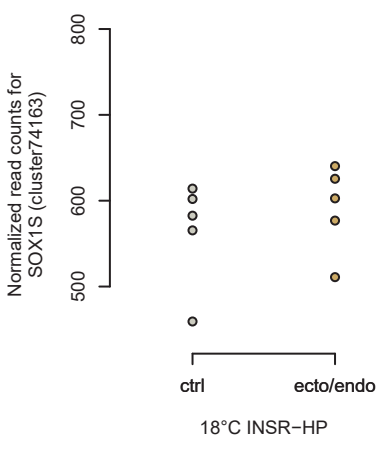

**iu**

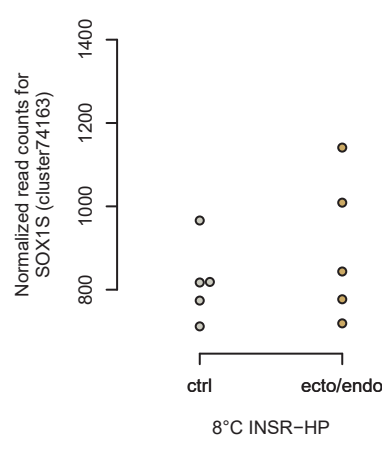

**iv**

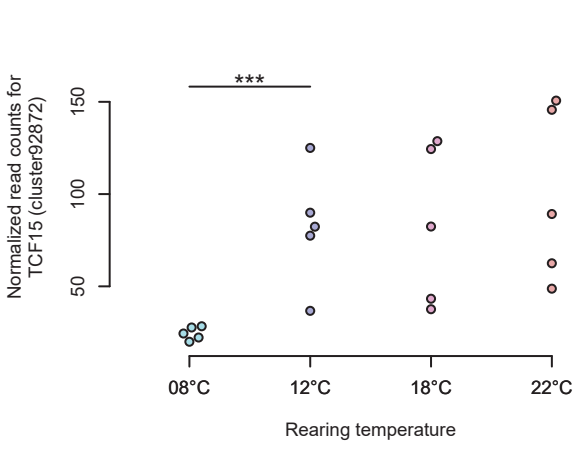

**iw**

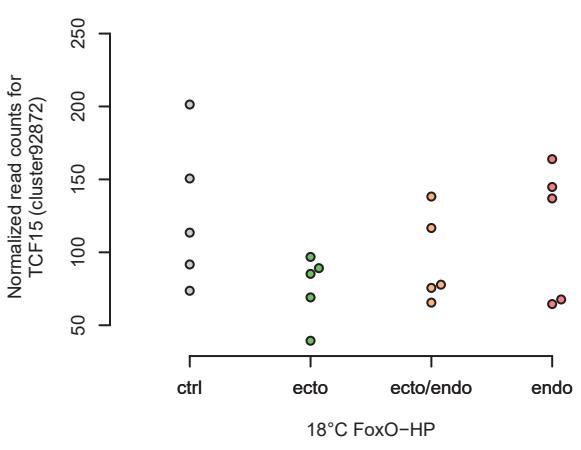

**ix**

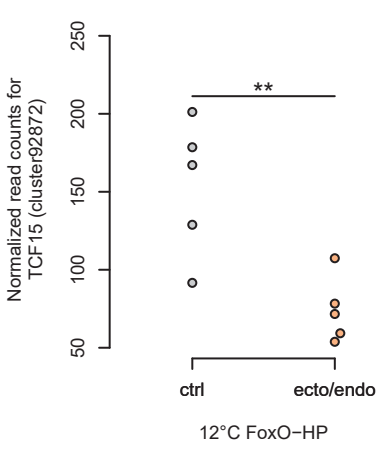

**iy**

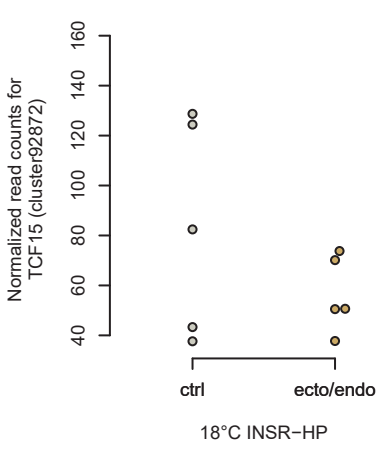

**iz**

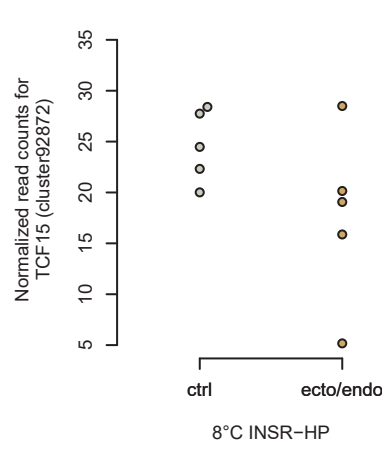

**ja**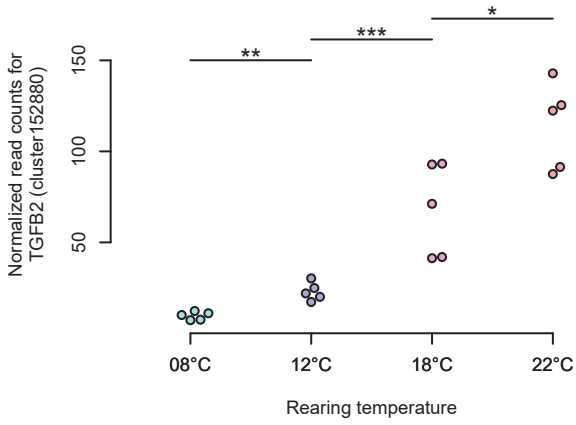**jb**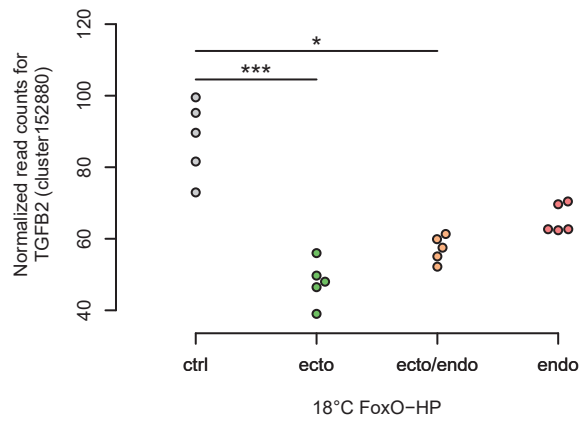**jc**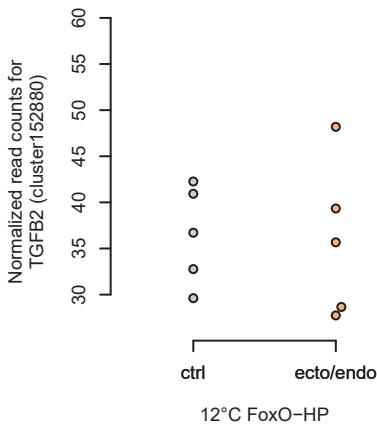**jd**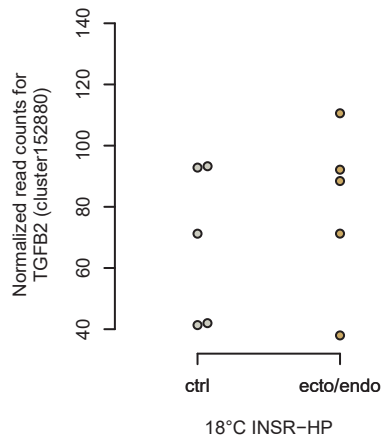**je**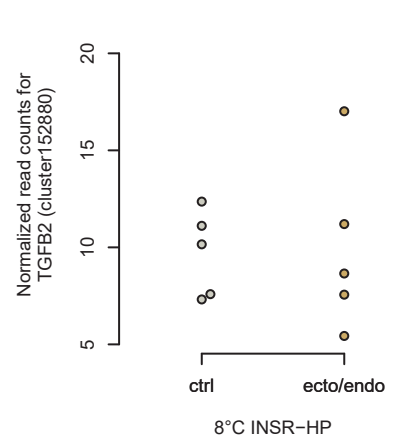**jf**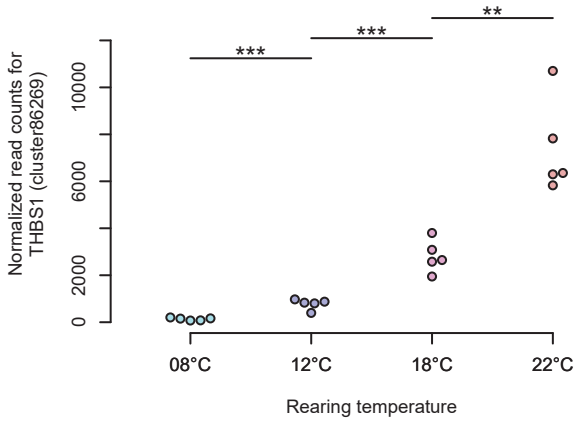**jj**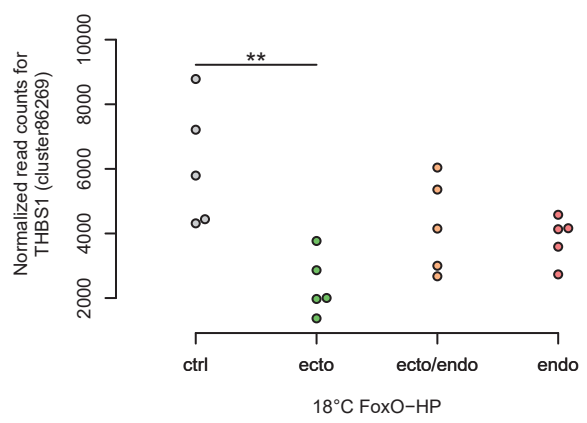**jh**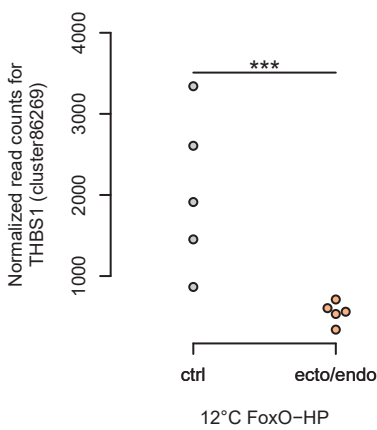**ji**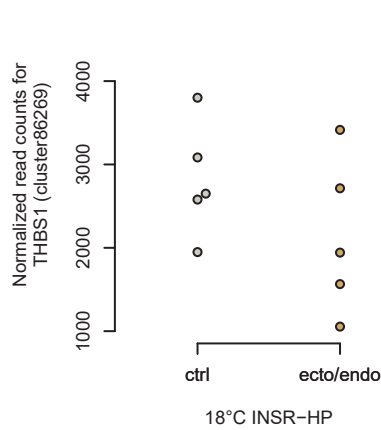**jj**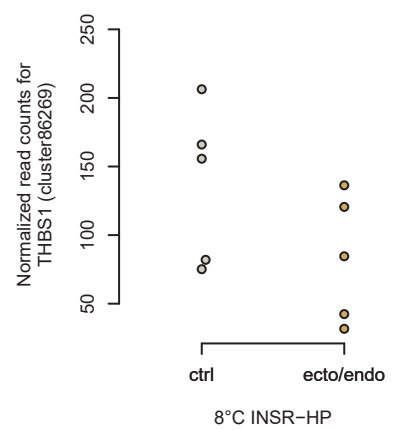

**jk**

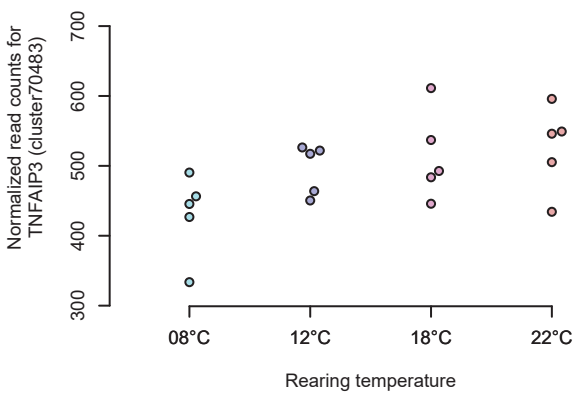

**jl**

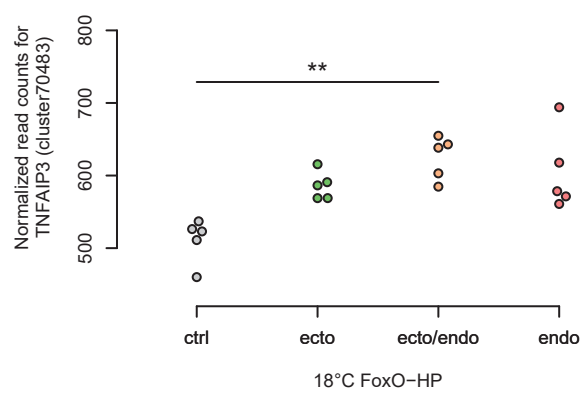

**jm**

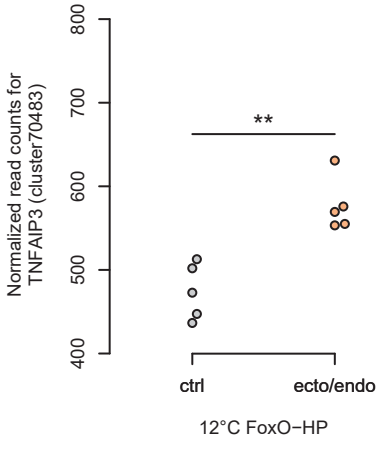

**jn**

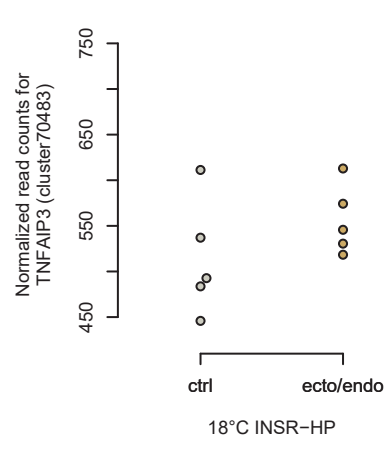

**jo**

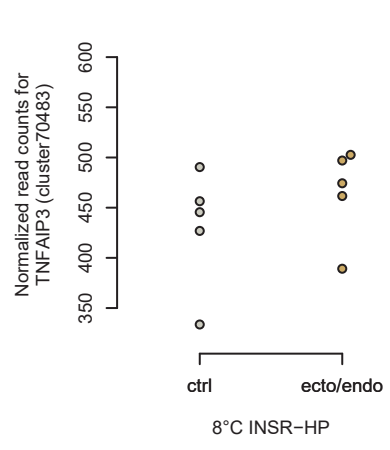

**jp**

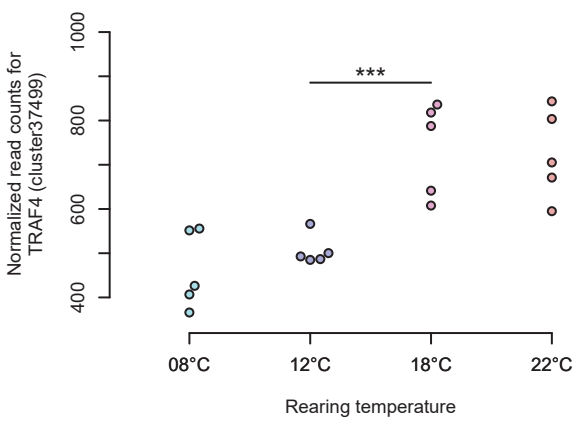

**jq**

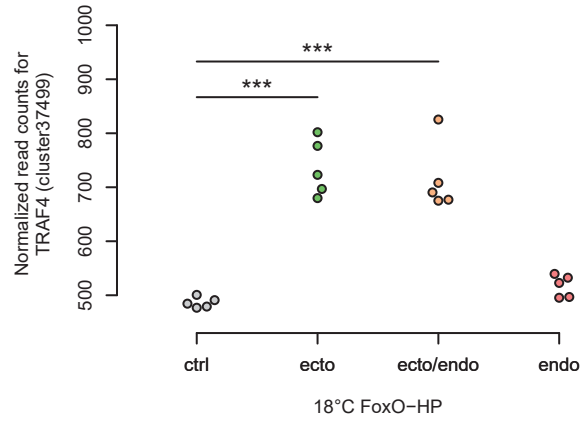

**jr**

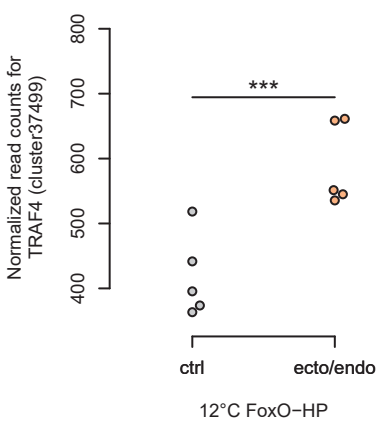

**js**

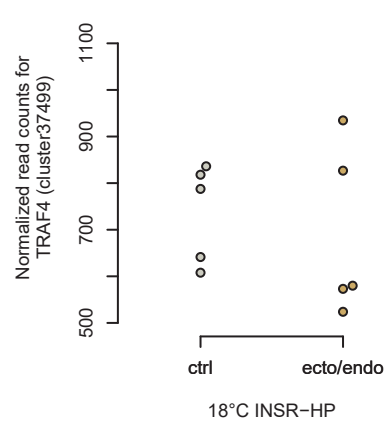

**jt**

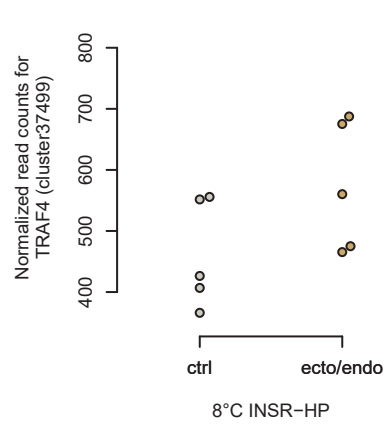

**ju**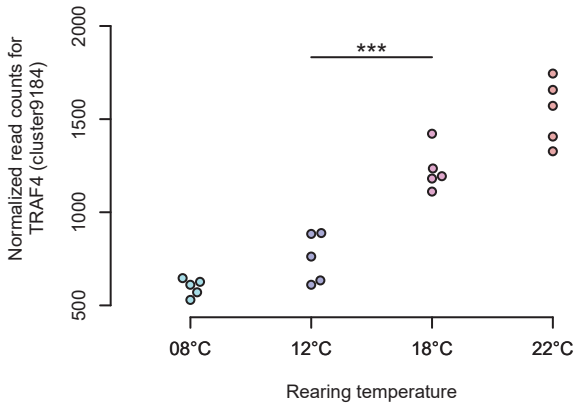**jv**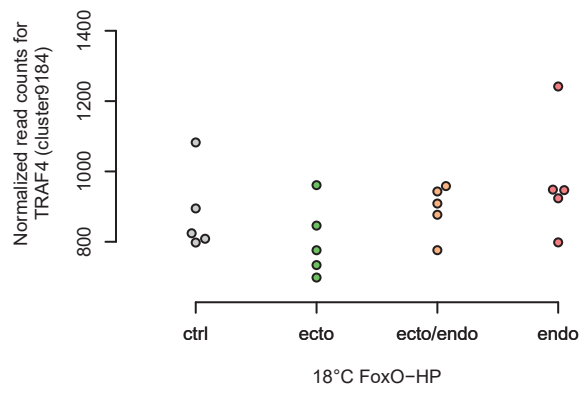**jw**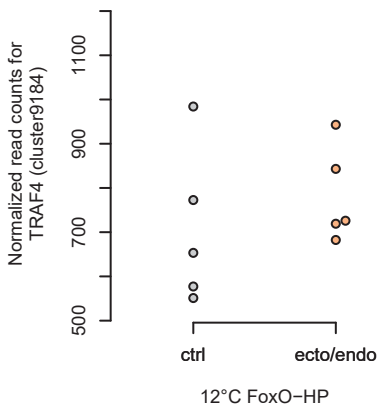**jx**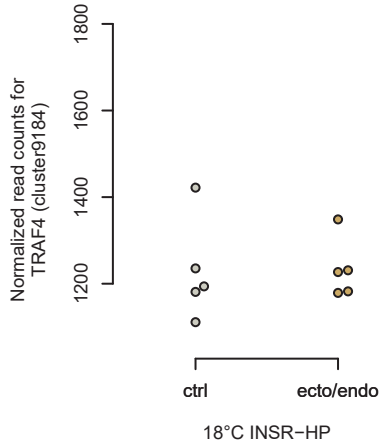**jy**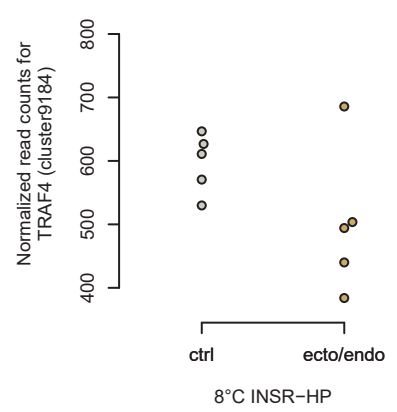**jz**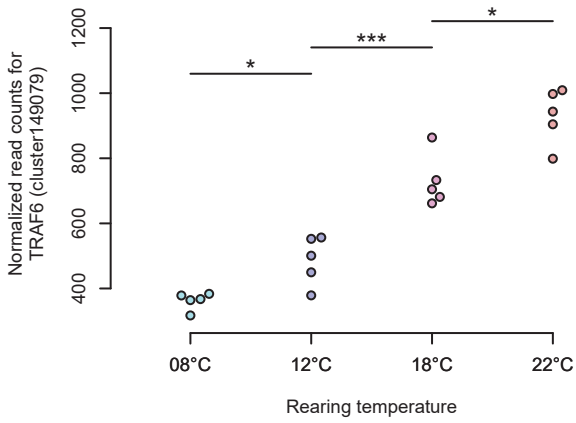**ka**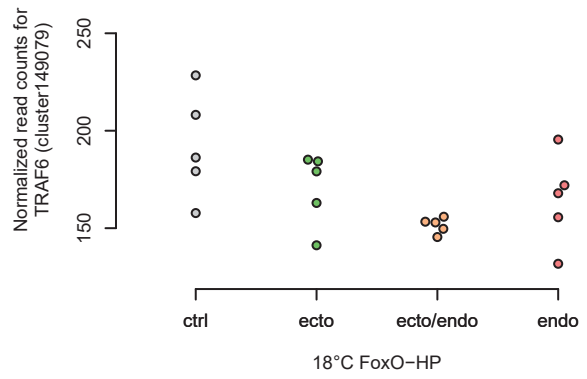**kb**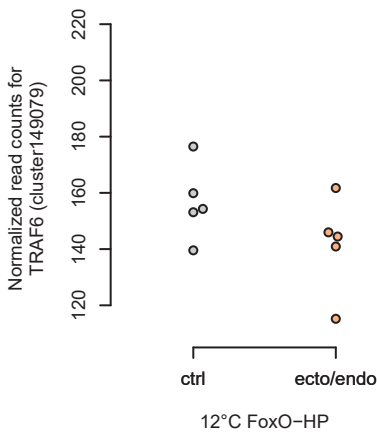**kc**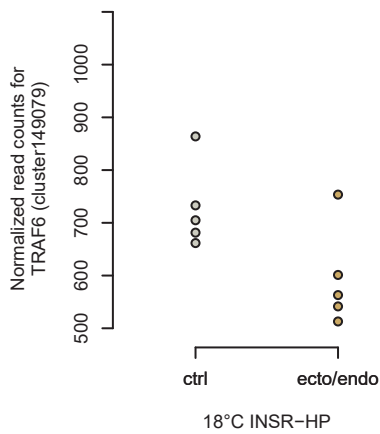**kd**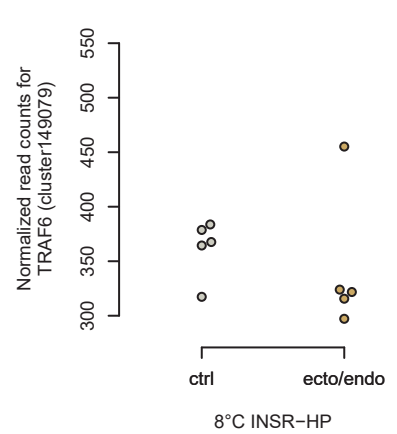



**ko**

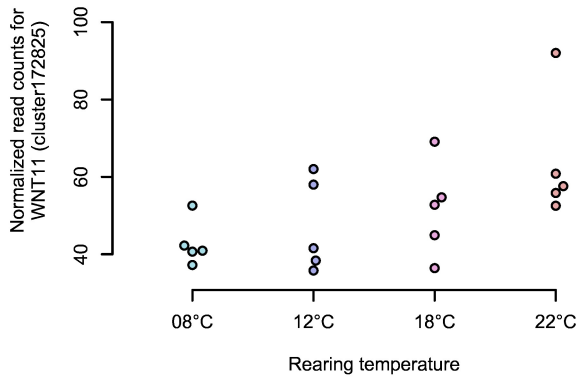

**kp**

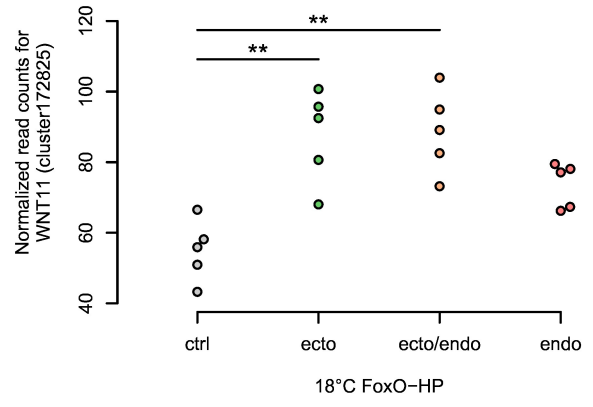

**kq**

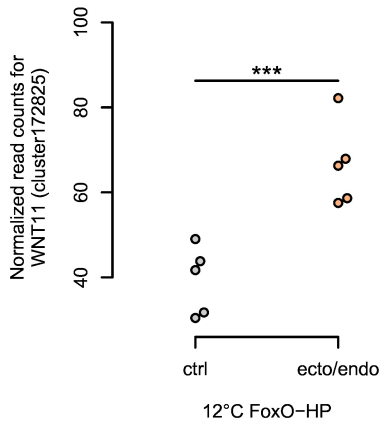

**kr**

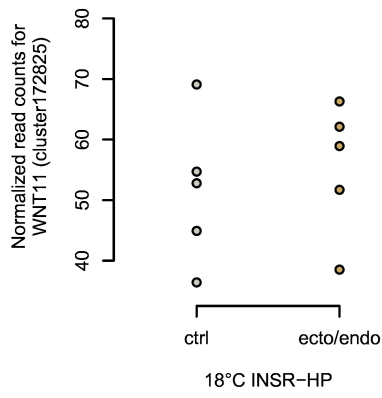

**ks**

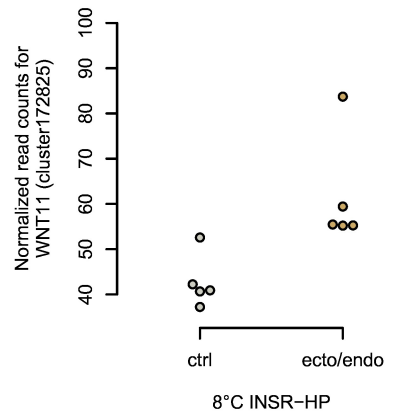

Supplement: 41467_2019_11136_MOESM2_ESM.pdf [file 41467_2019_11136_MOESM2_ESM.pdf]
